# Supplementary material for: Small molecule inhibitors of α-synuclein oligomers identified by targeting early dopamine-mediated motor impairment in C. elegans
Source: Springer Nature journal article supplement (doi:10.1186/s13024-021-00497-6), 2021-11-12
Supplement: MOESM1 [file 19861860]

**Supplementary Table 1.** List of genes selected for gene ontology (GO) enrichment analysis based on genotypes reported to have a coiler phenotype in Yemini *et al.*<sup>16</sup> Genotypes were included if reported to demonstrate “time spent coiled” or “coil frequency” greater than control (q value  $\leq 0.05$ ). Genes are represented in alphabetical order (N=97).

| <b>Genes for GO Analysis</b> | <b>Genotypes with Coiler Phenotype</b> |
|------------------------------|----------------------------------------|
| <i>acd-2</i>                 | <i>acd-2(ok1237)</i>                   |
| <i>acd-5</i>                 | <i>acd-5(ok2657)</i>                   |
| <i>acr-3</i>                 | <i>acr-3(ok2049)</i>                   |
| <i>acr-9</i>                 | <i>acr-9(ok933)</i>                    |
| <i>asic-2</i>                | <i>asic-2(ok289)</i>                   |
| <i>bas-1</i>                 | <i>bas-1(ad446)</i>                    |
| <i>cat-2</i>                 | <i>cat-2(e1112)</i>                    |
| <i>dnc-1</i>                 | <i>dnc-1(or404)</i>                    |
| <i>dop-1</i>                 | <i>dop-1(vs100);dop-3(vs106)</i>       |
| <i>dop-2</i>                 | <i>dop-2(vs105)</i>                    |
| <i>dop-3</i>                 | <i>dop-3(vs106)</i>                    |
| <i>dop-4</i>                 | <i>dop-4(tm1392)</i>                   |
| <i>eat-16</i>                | <i>eat-16(sa609)</i>                   |
| <i>egas-2</i>                | <i>egas-2(ok1477)</i>                  |
| <i>egg-5</i>                 | <i>egg-5(ok1781)</i>                   |
| <i>egl-10</i>                | <i>egl-10(md176)</i>                   |
| <i>egl-11</i>                | <i>egl-11(n587)</i>                    |
| <i>egl-19</i>                | <i>egl-19(n2368)</i>                   |
| <i>egl-2</i>                 | <i>egl-2(n693)</i>                     |
| <i>egl-20</i>                | <i>egl-20(mu39)</i>                    |
| <i>egl-21</i>                | <i>egl-21(n611)</i>                    |
| <i>egl-30</i>                | <i>egl-30(ep271)</i>                   |
| <i>egl-9</i>                 | <i>egl-9(n586)</i>                     |
| <i>ets-10</i>                | <i>ets-10(gk596)</i>                   |
| <i>flp-17</i>                | <i>flp-17(ok3587)</i>                  |
| <i>flp-28</i>                | <i>flp-28(gk1075)</i>                  |
| <i>gly-2</i>                 | <i>gly-2(gk204)</i>                    |
| <i>gpa-13</i>                | <i>gpa-13(pk1270)</i>                  |
| <i>gpa-14</i>                | <i>gpa-14(pk347)</i>                   |
| <i>gpa-15</i>                | <i>gpa-15(pk477)</i>                   |
| <i>gpa-3</i>                 | <i>gpa-3(pk35)</i>                     |
| <i>gpa-5</i>                 | <i>gpa-5(pk376)</i>                    |
| <i>gpa-6</i>                 | <i>gpa-6(pk480)</i>                    |
| <i>hcf-1</i>                 | <i>hcf-1(ok559)</i>                    |
| <i>him-5</i>                 | <i>spe-41(sy693); him-5(e1490)</i>     |
| <i>ins-25</i>                | <i>ins-25(ok2773)</i>                  |
| <i>ins-28</i>                | <i>ins-28(ok2722)</i>                  |
| <i>ins-3</i>                 | <i>ins-3(ok2488)</i>                   |
| <i>jnk-1</i>                 | <i>jnk-1(gk7)</i>                      |

|                |                                                         |
|----------------|---------------------------------------------------------|
| <i>lev-1</i>   | <i>lev-1(x427)</i>                                      |
| <i>lig-4</i>   | <i>lig-4(ok716)</i>                                     |
| <i>lon-2</i>   | <i>lon-2(e678)</i>                                      |
| <i>mec-10</i>  | <i>mec-10(u20)</i>                                      |
| <i>mec-12</i>  | <i>mec-12(e1605); bzIs17[pmec-4::YC2.12; lin-15(+)]</i> |
| <i>mec-14</i>  | <i>mec-14(u55); bzIs18[pmec-4::YC2.12; lin-15(+)]</i>   |
| <i>mec-18</i>  | <i>mec-18(u228); bzIs17[pmec-4::YC2.12; lin-15(+)]</i>  |
| <i>mec-4</i>   | <i>mec-4(u253); bzIs17[pmec-4::YC2.12; lin-15(+)]</i>   |
| <i>mir-124</i> | <i>mir-124(n4255)</i>                                   |
| <i>mod-1</i>   | <i>mod-1(ok103)</i>                                     |
| <i>nlp-1</i>   | <i>nlp-1(ok1469)</i>                                    |
| <i>nlp-17</i>  | <i>nlp-17(ok3461)</i>                                   |
| <i>npr-1</i>   | <i>npr-1(ad609)</i>                                     |
| <i>npr-12</i>  | <i>npr-12(tm1498)</i>                                   |
| <i>npr-2</i>   | <i>npr-2(ok419)</i>                                     |
| <i>npr-3</i>   | <i>npr-3(tm1583)</i>                                    |
| <i>ocr-4</i>   | <i>ocr-4(vs137)</i>                                     |
| <i>odr-3</i>   | <i>odr-3(n2150)</i>                                     |
| <i>rab-3</i>   | <i>rab-3(y250)</i>                                      |
| <i>ser-1</i>   | <i>ser-1(ok345)</i>                                     |
| <i>ser-2</i>   | <i>ser-2(pk1357)</i>                                    |
| <i>ser-5</i>   | <i>ser-5(tm2654)</i>                                    |
| <i>spe-41</i>  | <i>spe-41(sy693); him-5(e1490)</i>                      |
| <i>syg-2</i>   | <i>syg-2(ky671)</i>                                     |
| <i>tbh-1</i>   | <i>tbh-1(n3247)</i>                                     |
| <i>tom-1</i>   | <i>tom-1(ok285)</i>                                     |
| <i>tph-1</i>   | <i>tph-1(mg280)</i>                                     |
| <i>trp-4</i>   | <i>trp-4(sy695)</i>                                     |
| <i>unc-1</i>   | <i>unc-1(e1598)</i>                                     |
| <i>unc-10</i>  | <i>unc-10(e102)</i>                                     |
| <i>unc-101</i> | <i>unc-101(m1)</i>                                      |
| <i>unc-104</i> | <i>unc-104(e1265)</i>                                   |
| <i>unc-105</i> | <i>unc-105(ok1432)</i>                                  |
| <i>unc-108</i> | <i>unc-108(n501)</i>                                    |
| <i>unc-115</i> | <i>unc-115(mn481)</i>                                   |
| <i>unc-118</i> | <i>unc-118(e2331)</i>                                   |
| <i>unc-122</i> | <i>unc-122(e2520)</i>                                   |
| <i>unc-127</i> | <i>unc-127(hs13)</i>                                    |
| <i>unc-18</i>  | <i>unc-18(e81)</i>                                      |
| <i>unc-2</i>   | <i>unc-2(gk366)</i>                                     |
| <i>unc-26</i>  | <i>unc-26(m2)</i>                                       |
| <i>unc-3</i>   | <i>unc-3(e151)</i>                                      |
| <i>unc-32</i>  | <i>unc-32(e189)</i>                                     |

|               |                       |
|---------------|-----------------------|
| <i>unc-34</i> | <i>unc-34(e566)</i>   |
| <i>unc-37</i> | <i>unc-37(e262)</i>   |
| <i>unc-38</i> | <i>unc-38(e264)</i>   |
| <i>unc-4</i>  | <i>unc-4(e120)</i>    |
| <i>unc-42</i> | <i>unc-42(e270)</i>   |
| <i>unc-55</i> | <i>unc-55(e402)</i>   |
| <i>unc-63</i> | <i>unc-63(ok1075)</i> |
| <i>unc-75</i> | <i>unc-75(e950)</i>   |
| <i>unc-76</i> | <i>unc-76(e911)</i>   |
| <i>unc-77</i> | <i>unc-77(e625)</i>   |
| <i>unc-8</i>  | <i>unc-8(e15)</i>     |
| <i>unc-86</i> | <i>unc-86(e1416)</i>  |
| <i>unc-9</i>  | <i>unc-9(e101)</i>    |
| <i>vab-7</i>  | <i>vab-7(e1562)</i>   |
| <i>zyg-9</i>  | <i>zyg-9(b244)</i>    |

---

**Supplementary Table 2.** Gene ontology (GO) enrichment analysis of *C. elegans* strains with coiler phenotype. Biological processes are listed if over-represented by  $\geq 100$ -fold within the GO over-representation analysis of biological processes using PANTHER “GO biological process complete” ([pantherdb.org/geneListAnalysis.do](http://pantherdb.org/geneListAnalysis.do)). *C. elegans* genome was used as the reference list. Biological processes with  $\geq 100$ -fold enrichment were ranked according to  $-\log_{10}$  of the false discovery rate (FDR).

| <b>Biological Process</b>                                          | <b>Gene Ontology Term</b> | <b># of Genes from Input</b> | <b># of Genes Expected</b> | <b><math>-\log_{10}</math> (FDR)</b> |
|--------------------------------------------------------------------|---------------------------|------------------------------|----------------------------|--------------------------------------|
| Dopamine receptor signaling pathway                                | (GO:0007212)              | 8                            | 0.07                       | 11.266                               |
| Response to food                                                   | (GO:0032094)              | 5                            | 0.04                       | 6.669586                             |
| Calcium ion import across plasma membrane                          | (GO:0098703)              | 3                            | 0.02                       | 3.761954                             |
| Calcium ion import into cytosol                                    | (GO:1902656)              | 3                            | 0.02                       | 3.759451                             |
| Adrenergic receptor signaling pathway                              | (GO:0071875)              | 3                            | 0.02                       | 3.756962                             |
| Adenylate cyclase-activating adrenergic receptor signaling pathway | (GO:0071880)              | 3                            | 0.02                       | 3.754487                             |
| Catechol-containing compound metabolic process                     | (GO:0009712)              | 3                            | 0.03                       | 3.605548                             |
| Catechol-containing compound biosynthetic process                  | (GO:0009713)              | 3                            | 0.03                       | 3.603801                             |
| Dopamine metabolic process                                         | (GO:0042417)              | 3                            | 0.03                       | 3.60206                              |
| Catecholamine biosynthetic process                                 | (GO:0042423)              | 3                            | 0.03                       | 3.598599                             |
| Catecholamine metabolic process                                    | (GO:0006584)              | 3                            | 0.03                       | 3.596879                             |
| Synaptic target recognition                                        | (GO:0008039)              | 2                            | 0.01                       | 2.31158                              |
| Serotonin biosynthetic process                                     | (GO:0042427)              | 2                            | 0.01                       | 2.310691                             |
| Indole-containing compound biosynthetic process                    | (GO:0042435)              | 2                            | 0.01                       | 2.308919                             |
| Dopamine biosynthetic process from tyrosine                        | (GO:0006585)              | 2                            | 0.01                       | 2.307153                             |
| Primary amino compound biosynthetic process                        | (GO:1901162)              | 2                            | 0.01                       | 2.305395                             |
| Adenylate cyclase-activating dopamine receptor signaling pathway   | (GO:0007191)              | 2                            | 0.01                       | 2.303644                             |
| Positive regulation of synaptic transmission, gabaergic            | (GO:0032230)              | 2                            | 0.02                       | 2.155523                             |
| Regulation of synaptic vesicle exocytosis                          | (GO:2000300)              | 2                            | 0.02                       | 2.154282                             |

|                                          |              |   |      |          |
|------------------------------------------|--------------|---|------|----------|
| Serotonin metabolic process              | (GO:0042428) | 2 | 0.02 | 2.152427 |
| Nonassociative learning                  | (GO:0046958) | 2 | 0.02 | 2.151195 |
| Habituation                              | (GO:0046959) | 2 | 0.02 | 2.149354 |
| Primary amino compound metabolic process | (GO:1901160) | 2 | 0.02 | 2.14813  |

---

**Supplementary Table 3.** All proteins co-immunoprecipitated with anti- $\alpha$ -synuclein antibodies from GFP or  $\alpha$ -synuclein *C. elegans* lysates identified by mass spectrometry (N=207). Proteins identified in immunoprecipitants from  $\alpha$ -synuclein *C. elegans* lysates but absent from GFP *C. elegans* lysates were selected for gene ontology enrichment analysis (N=131; highlighted in blue).

| Identified Proteins                                                                        | Accession Number               | Total Spectrum Count |     |
|--------------------------------------------------------------------------------------------|--------------------------------|----------------------|-----|
|                                                                                            |                                | GFP                  | Syn |
| Uncharacterized protein OS=Caenorhabditis elegans GN=lev-11 PE=1 SV=1                      | tr A0A0K3AUC2 A0A0K3AUC2_CAEEL | 0                    | 68  |
| Myosin-4 OS=Caenorhabditis elegans GN=unc-54 PE=1 SV=2                                     | sp P02566 MYO4_CAEEL           | 0                    | 33  |
| Tropomyosin isoforms c/e OS=Caenorhabditis elegans GN=lev-11 PE=1 SV=1                     | sp Q27249 TPM3_CAEEL           | 0                    | 30  |
| Nuclear anchorage protein 1 OS=Caenorhabditis elegans GN=anc-1 PE=1 SV=3                   | sp Q9N4M4 ANC1_CAEEL           | 0                    | 17  |
| SaPosin-like Protein family OS=Caenorhabditis elegans GN=spp-10 PE=1 SV=3                  | tr Q18276 Q18276_CAEEL (+1)    | 0                    | 9   |
| Uncharacterized protein OS=Caenorhabditis elegans GN=CELE_ZC247.1 PE=1 SV=1                | tr G5EBP5 G5EBP5_CAEEL         | 0                    | 7   |
| Uncharacterized protein OS=Caenorhabditis elegans GN=CELE_Y22D7AL.10 PE=1 SV=1             | tr Q965Q1 Q965Q1_CAEEL         | 0                    | 7   |
| Uncharacterized protein F13E6.1 OS=Caenorhabditis elegans GN=F13E6.1 PE=3 SV=2             | sp P55326 YZG1_CAEEL           | 0                    | 7   |
| Conserved Cysteine/Glycine domain protein OS=Caenorhabditis elegans GN=ccg-1 PE=1 SV=1     | tr Q9NA39 Q9NA39_CAEEL         | 0                    | 7   |
| ATP synthase subunit alpha, mitochondrial OS=Caenorhabditis elegans GN=H28O16.1 PE=1 SV=1  | sp Q9XXK1 ATPA_CAEEL           | 0                    | 6   |
| Prion-like-(Q/N-rich)-domain-bearing protein OS=Caenorhabditis elegans GN=pqn-22 PE=1 SV=2 | tr H2KZA3 H2KZA3_CAEEL (+9)    | 0                    | 6   |
| Cytochrome b-c1 complex subunit 6 OS=Caenorhabditis elegans GN=CELE_T27E9.2 PE=1 SV=1      | tr O45864 O45864_CAEEL         | 0                    | 6   |
| Probable malate dehydrogenase, mitochondrial OS=Caenorhabditis elegans GN=mdh-2 PE=3 SV=1  | sp O02640 MDHM_CAEEL           | 0                    | 5   |
| Fatty-acid and retinol-binding protein 2 OS=Caenorhabditis elegans GN=far-2 PE=1 SV=1      | sp P34383 FAR2_CAEEL           | 0                    | 5   |
| Uncharacterized protein OS=Caenorhabditis elegans GN=CELE_Y47G6A.15 PE=1 SV=1              | tr Q65XX4 Q65XX4_CAEEL         | 0                    | 5   |
| Uncharacterized protein OS=Caenorhabditis elegans GN=CELE_R09B3.3 PE=1 SV=1                | tr O45713 O45713_CAEEL         | 0                    | 5   |
| Protein Up-regulated in Daf-2(Gf)                                                          | tr G5EBF3 G5EBF3_CAEEL         | 0                    | 4   |

|                                                                                                  |                             |   |   |  |
|--------------------------------------------------------------------------------------------------|-----------------------------|---|---|--|
| OS=Caenorhabditis elegans GN=pud-2.1<br>PE=1 SV=1                                                |                             |   |   |  |
| GEX Interacting protein OS=Caenorhabditis<br>elegans GN=gei-15 PE=1 SV=1                         | tr G4SI07 G4SI07_CAEEL      | 0 | 4 |  |
| Uncharacterized protein OS=Caenorhabditis<br>elegans GN=CELE_H03A11.2 PE=1 SV=2                  | tr G5EFE3 G5EFE3_CAEEL      | 0 | 4 |  |
| Uncharacterized protein OS=Caenorhabditis<br>elegans GN=osm-11 PE=1 SV=1                         | tr O45346 O45346_CAEEL      | 0 | 4 |  |
| Uncharacterized protein OS=Caenorhabditis<br>elegans GN=CELE_E04F6.8 PE=1 SV=1                   | tr Q19063 Q19063_CAEEL      | 0 | 4 |  |
| Paramyosin OS=Caenorhabditis elegans<br>GN=unc-15 PE=1 SV=1                                      | sp P10567 MYSP_CAEEL        | 0 | 3 |  |
| Sorting NeXin OS=Caenorhabditis elegans<br>GN=snx-13 PE=4 SV=1                                   | tr H1UBK0 H1UBK0_CAEEL (+2) | 0 | 3 |  |
| Superoxide dismutase [Cu-Zn]<br>OS=Caenorhabditis elegans GN=sod-1<br>PE=1 SV=2                  | sp P34697 SODC_CAEEL        | 0 | 3 |  |
| Uncharacterized protein OS=Caenorhabditis<br>elegans GN=CELE_M01H9.3 PE=1 SV=1                   | tr H2L0G8 H2L0G8_CAEEL (+1) | 0 | 3 |  |
| Coiled coil Helix Coiled coiled Helix domain<br>OS=Caenorhabditis elegans GN=chch-3<br>PE=1 SV=1 | tr Q21551 Q21551_CAEEL      | 0 | 3 |  |
| Uncharacterized protein OS=Caenorhabditis<br>elegans GN=C42D4.1 PE=1 SV=1                        | tr Q18577 Q18577_CAEEL      | 0 | 3 |  |
| RutC family protein C23G10.2<br>OS=Caenorhabditis elegans GN=C23G10.2<br>PE=3 SV=3               | sp Q10121 YSD2_CAEEL        | 0 | 3 |  |
| Uncharacterized protein OS=Caenorhabditis<br>elegans GN=CELE_Y43F8B.1 PE=1 SV=1                  | tr B7FAR9 B7FAR9_CAEEL (+4) | 0 | 3 |  |
| Clathrin Light Chain OS=Caenorhabditis<br>elegans GN=clic-1 PE=1 SV=1                            | tr P90961 P90961_CAEEL      | 0 | 3 |  |
| Ribosomal protein, Large subunit, Acidic<br>(P1) OS=Caenorhabditis elegans GN=rla-2<br>PE=1 SV=1 | tr Q9U1X9 Q9U1X9_CAEEL      | 0 | 3 |  |
| Uncharacterized protein OS=Caenorhabditis<br>elegans GN=CELE_R06C1.4 PE=1 SV=1                   | tr O62337 O62337_CAEEL      | 0 | 3 |  |
| GaLECTin OS=Caenorhabditis elegans<br>GN=lec-2 PE=1 SV=2                                         | tr Q20684 Q20684_CAEEL      | 0 | 3 |  |
| Ubiquitin-60S ribosomal protein L40<br>OS=Caenorhabditis elegans GN=ubq-2<br>PE=3 SV=2           | sp P49632 RL40_CAEEL        | 0 | 2 |  |
| Heat shock 70 kDa protein A<br>OS=Caenorhabditis elegans GN=hsp-1<br>PE=1 SV=2                   | sp P09446 HSP7A_CAEEL       | 0 | 2 |  |
| Glyceraldehyde-3-phosphate<br>dehydrogenase 2 OS=Caenorhabditis<br>elegans GN=gpd-2 PE=3 SV=2    | sp P17329 G3P2_CAEEL (+1)   | 0 | 2 |  |
| Elongation factor 2 OS=Caenorhabditis<br>elegans GN=eef-2 PE=2 SV=4                              | sp P29691 EF2_CAEEL         | 0 | 2 |  |
| Uncharacterized protein ZK637.2<br>OS=Caenorhabditis elegans GN=ZK637.2<br>PE=3 SV=2             | sp P30629 YOU2_CAEEL        | 0 | 2 |  |
| Transthyretin-like protein 2<br>OS=Caenorhabditis elegans GN=ttr-2 PE=1<br>SV=1                  | sp P34500 TTR2_CAEEL        | 0 | 2 |  |
| ATP synthase subunit beta, mitochondrial                                                         | sp P46561 ATPB_CAEEL        | 0 | 2 |  |

|                                                                                                                         |                                        |   |   |
|-------------------------------------------------------------------------------------------------------------------------|----------------------------------------|---|---|
| OS=Caenorhabditis elegans GN=atp-2<br>PE=1 SV=2<br>Peptidyl-prolyl cis-trans isomerase 5                                | sp P52013 CYP5_CAEEL                   | 0 | 2 |
| OS=Caenorhabditis elegans GN=cyn-5<br>PE=1 SV=2<br>Tubulin beta-2 chain OS=Caenorhabditis<br>elegans GN=tbb-2 PE=3 SV=1 | sp P52275 TBB2_CAEEL (+2)              | 0 | 2 |
| Small ubiquitin-related modifier<br>OS=Caenorhabditis elegans GN=smo-1<br>PE=1 SV=1                                     | sp P55853 SUMO_CAEEL                   | 0 | 2 |
| Tubulin polymerization-promoting protein<br>homolog OS=Caenorhabditis elegans<br>GN=tppp-1 PE=1 SV=1                    | sp P91127 TPPP_CAEEL                   | 0 | 2 |
| Uncharacterized protein T28D9.1<br>OS=Caenorhabditis elegans GN=T28D9.1<br>PE=4 SV=2                                    | sp Q10020 YSX1_CAEEL                   | 0 | 2 |
| NHP2-like protein 1 homolog<br>OS=Caenorhabditis elegans GN=M28.5<br>PE=3 SV=1                                          | sp Q21568 NH2L1_CAEEL                  | 0 | 2 |
| Probable voltage-dependent anion-selective<br>channel OS=Caenorhabditis elegans<br>GN=vdac-1 PE=3 SV=2                  | sp Q21752 VDAC_CAEEL                   | 0 | 2 |
| Myosin-2 essential light chain<br>OS=Caenorhabditis elegans GN=mlc-5<br>PE=1 SV=1                                       | sp Q9XVI9 MLC5_CAEEL                   | 0 | 2 |
| PeRoxireDoXin OS=Caenorhabditis elegans<br>GN=prdx-2 PE=1 SV=1                                                          | tr A0A0K3AUJ9 A0A0K3AUJ9_CAEEL<br>(+2) | 0 | 2 |
| MLP/CRP family (Muscle LIM<br>Protein/Cysteine-rich Protein)<br>OS=Caenorhabditis elegans GN=mlp-1<br>PE=1 SV=1         | tr H2KZV8 H2KZV8_CAEEL (+1)            | 0 | 2 |
| Uncharacterized protein OS=Caenorhabditis<br>elegans GN=C49G7.3 PE=1 SV=1                                               | tr O16226 O16226_CAEEL                 | 0 | 2 |
| PHaryngeal gland Toxin-related<br>OS=Caenorhabditis elegans GN=phat-4<br>PE=1 SV=1                                      | tr O16424 O16424_CAEEL                 | 0 | 2 |
| Heat Shock Protein OS=Caenorhabditis<br>elegans GN=hsp-25 PE=1 SV=1                                                     | tr Q17849 Q17849_CAEEL (+1)            | 0 | 2 |
| Uncharacterized protein OS=Caenorhabditis<br>elegans GN=C15C7.5 PE=1 SV=1                                               | tr Q18012 Q18012_CAEEL                 | 0 | 2 |
| Uncharacterized protein OS=Caenorhabditis<br>elegans GN=C15H9.9 PE=1 SV=1                                               | tr Q18032 Q18032_CAEEL                 | 0 | 2 |
| Uncharacterized protein OS=Caenorhabditis<br>elegans GN=CELE_T28F4.5 PE=1 SV=1                                          | tr Q22850 Q22850_CAEEL                 | 0 | 2 |
| Ribosomal Protein, Small subunit<br>OS=Caenorhabditis elegans GN=rps-20<br>PE=1 SV=1                                    | tr Q8WQA8 Q8WQA8_CAEEL                 | 0 | 2 |
| CathePsin L family OS=Caenorhabditis<br>elegans GN=cpl-1 PE=1 SV=1                                                      | tr O45734 O45734_CAEEL                 | 0 | 2 |
| SaPosin-like Protein family<br>OS=Caenorhabditis elegans GN=spp-15<br>PE=4 SV=1                                         | tr Q9BIC4 Q9BIC4_CAEEL                 | 0 | 2 |
| Myosin-3 OS=Caenorhabditis elegans<br>GN=myo-3 PE=2 SV=1                                                                | sp P12844 MYO3_CAEEL                   | 0 | 2 |
| Heat shock protein Hsp-12.2<br>OS=Caenorhabditis elegans GN=hsp-12.2                                                    | sp P34328 HSP10_CAEEL                  | 0 | 2 |



|                                                                                                                  |                             |   |   |  |
|------------------------------------------------------------------------------------------------------------------|-----------------------------|---|---|--|
| PE=3 SV=1                                                                                                        |                             |   |   |  |
| Histone H4 OS=Caenorhabditis elegans<br>GN=his-1 PE=1 SV=2                                                       | sp P62784 H4_CAEEL          | 0 | 2 |  |
| Uncharacterized protein OS=Caenorhabditis<br>elegans GN=C53B7.3 PE=1 SV=1                                        | tr H2KZE2 H2KZE2_CAEEL (+2) | 0 | 2 |  |
| Uncharacterized protein OS=Caenorhabditis<br>elegans GN=CELE_Y53G8AR.6 PE=1<br>SV=1                              | tr Q9N3G0 Q9N3G0_CAEEL      | 0 | 2 |  |
| Histone H2A.V OS=Caenorhabditis elegans<br>GN=htz-1 PE=2 SV=3                                                    | sp Q27511 H2AV_CAEEL        | 0 | 2 |  |
| Chondroitin proteoglycan 1<br>OS=Caenorhabditis elegans GN=cpg-1<br>PE=1 SV=1                                    | sp Q17802 CPG1_CAEEL        | 0 | 1 |  |
| 40S ribosomal protein S17<br>OS=Caenorhabditis elegans GN=rps-17<br>PE=3 SV=2                                    | sp O01692 RS17_CAEEL        | 0 | 1 |  |
| Neuropeptide-like protein 31<br>OS=Caenorhabditis elegans GN=nlp-31<br>PE=2 SV=1                                 | sp O44662 NLP31_CAEEL (+7)  | 0 | 1 |  |
| Papilin OS=Caenorhabditis elegans<br>GN=mig-6 PE=1 SV=1                                                          | sp O76840 PPN1_CAEEL        | 0 | 1 |  |
| Myosin-2 OS=Caenorhabditis elegans<br>GN=myo-2 PE=1 SV=2                                                         | sp P12845 MYO2_CAEEL        | 0 | 1 |  |
| Cuticle collagen 8 OS=Caenorhabditis<br>elegans GN=col-8 PE=3 SV=2                                               | sp P18833 COL8_CAEEL        | 0 | 1 |  |
| Tubulin alpha-2 chain OS=Caenorhabditis<br>elegans GN=tba-2 PE=2 SV=1                                            | sp P34690 TBA2_CAEEL (+5)   | 0 | 1 |  |
| 14-3-3-like protein 1 OS=Caenorhabditis<br>elegans GN=par-5 PE=1 SV=2                                            | sp P41932 14331_CAEEL       | 0 | 1 |  |
| Chaperonin homolog Hsp-60, mitochondrial<br>OS=Caenorhabditis elegans GN=hsp-60<br>PE=2 SV=2                     | sp P50140 CH60_CAEEL (+2)   | 0 | 1 |  |
| NADH dehydrogenase [ubiquinone] 1 beta<br>subcomplex subunit 7 OS=Caenorhabditis<br>elegans GN=D2030.4 PE=3 SV=1 | sp P90789 NDUB7_CAEEL       | 0 | 1 |  |
| Probable V-type proton ATPase subunit G<br>OS=Caenorhabditis elegans GN=vha-10<br>PE=3 SV=1                      | sp P91303 VATG_CAEEL        | 0 | 1 |  |
| Transthyretin-like protein 5<br>OS=Caenorhabditis elegans GN=ttr-5 PE=3<br>SV=1                                  | sp Q03575 TTR5_CAEEL        | 0 | 1 |  |
| Uncharacterized protein F15G9.1<br>OS=Caenorhabditis elegans GN=F15G9.1<br>PE=4 SV=1                             | sp Q10033 YSI1_CAEEL (+1)   | 0 | 1 |  |
| Probable arginine kinase F46H5.3<br>OS=Caenorhabditis elegans GN=F46H5.3<br>PE=3 SV=2                            | sp Q10454 KARG1_CAEEL       | 0 | 1 |  |
| Aminopeptidase-like protein AC3.5<br>OS=Caenorhabditis elegans GN=AC3.5<br>PE=1 SV=2                             | sp Q17405 YQ02_CAEEL (+1)   | 0 | 1 |  |
| Probable arginine--tRNA ligase, cytoplasmic<br>OS=Caenorhabditis elegans GN=rrt-1 PE=3<br>SV=2                   | sp Q19825 SYRC_CAEEL (+2)   | 0 | 1 |  |
| Translation machinery-associated protein 7<br>homolog OS=Caenorhabditis elegans<br>GN=F49C12.11 PE=3 SV=1        | sp Q20588 TMA7_CAEEL        | 0 | 1 |  |

|                                                                                                                      |                             |   |   |
|----------------------------------------------------------------------------------------------------------------------|-----------------------------|---|---|
| Sperm-specific class P protein 9/11<br>OS=Caenorhabditis elegans GN=ssp-9<br>PE=2 SV=1                               | sp Q23058 SSP9_CAEEL        | 0 | 1 |
| Uncharacterized protein D2005.3<br>OS=Caenorhabditis elegans GN=D2005.3<br>PE=3 SV=2                                 | sp Q93408 YRGK_CAEEL        | 0 | 1 |
| 60S ribosomal protein L10a<br>OS=Caenorhabditis elegans GN=rpl-10a<br>PE=3 SV=1                                      | sp Q9N4I4 RL10A_CAEEL       | 0 | 1 |
| Probable splicing factor, arginine/serine-rich<br>3 OS=Caenorhabditis elegans GN=rsp-3<br>PE=1 SV=2                  | sp Q9NEW6 RSP3_CAEEL        | 0 | 1 |
| 40S ribosomal protein S27<br>OS=Caenorhabditis elegans GN=rps-27<br>PE=1 SV=3                                        | sp Q9TXP0 RS27_CAEEL        | 0 | 1 |
| Mitochondrial import inner membrane<br>translocase subunit Tim10<br>OS=Caenorhabditis elegans GN=tin-10<br>PE=3 SV=1 | sp Q9Y0V6 TIM10_CAEEL       | 0 | 1 |
| Synaptosomal-associated protein<br>OS=Caenorhabditis elegans GN=ric-4 PE=1<br>SV=1                                   | tr A5PEW5 A5PEW5_CAEEL (+1) | 0 | 1 |
| Uncharacterized protein OS=Caenorhabditis<br>elegans GN=C49G7.7 PE=4 SV=1                                            | tr B1GRK2 B1GRK2_CAEEL      | 0 | 1 |
| Oxysterol-binding protein<br>OS=Caenorhabditis elegans GN=obr-2<br>PE=1 SV=1                                         | tr B2D6P3 B2D6P3_CAEEL (+2) | 0 | 1 |
| Glycine Rich Secreted Protein<br>OS=Caenorhabditis elegans GN=grsp-2<br>PE=1 SV=1                                    | tr C6KRI7 C6KRI7_CAEEL (+6) | 0 | 1 |
| Cystatin OS=Caenorhabditis elegans<br>GN=cpi-1 PE=1 SV=1                                                             | tr G5EDZ9 G5EDZ9_CAEEL      | 0 | 1 |
| Hsp-70 Interacting Protein homolog<br>OS=Caenorhabditis elegans GN=hip-1<br>PE=1 SV=1                                | tr G5EE04 G5EE04_CAEEL      | 0 | 1 |
| CU (Copper) Chaperonin<br>OS=Caenorhabditis elegans GN=cuc-1<br>PE=1 SV=1                                            | tr G5EE41 G5EE41_CAEEL      | 0 | 1 |
| Major Sperm protein Domain containing<br>OS=Caenorhabditis elegans GN=msd-2<br>PE=1 SV=1                             | tr G5EEJ7 G5EEJ7_CAEEL      | 0 | 1 |
| COLLagen OS=Caenorhabditis elegans<br>GN=col-140 PE=1 SV=1                                                           | tr H2KYE5 H2KYE5_CAEEL (+1) | 0 | 1 |
| Uncharacterized protein OS=Caenorhabditis<br>elegans GN=CELE_R05A10.1 PE=1 SV=1                                      | tr H2L2I9 H2L2I9_CAEEL (+1) | 0 | 1 |
| Dauer Up-Regulated OS=Caenorhabditis<br>elegans GN=dur-1 PE=1 SV=1                                                   | tr H9G2T6 H9G2T6_CAEEL (+5) | 0 | 1 |
| COLLagen OS=Caenorhabditis elegans<br>GN=col-184 PE=1 SV=1                                                           | tr I2HA94 I2HA94_CAEEL (+1) | 0 | 1 |
| TropoNin T OS=Caenorhabditis elegans<br>GN=tnt-4 PE=1 SV=1                                                           | tr K8ERV5 K8ERV5_CAEEL (+1) | 0 | 1 |
| Acyl CoA DeHydrogenase<br>OS=Caenorhabditis elegans GN=acdh-5<br>PE=1 SV=1                                           | tr O01502 O01502_CAEEL      | 0 | 1 |
| GRoundhog (Hedgehog-like family)<br>OS=Caenorhabditis elegans GN=grd-14                                              | tr O02153 O02153_CAEEL (+1) | 0 | 1 |

|                                                                                                         |                             |   |   |
|---------------------------------------------------------------------------------------------------------|-----------------------------|---|---|
| PE=1 SV=2                                                                                               |                             |   |   |
| GRoundhog (Hedgehog-like family)<br>OS=Caenorhabditis elegans GN=grd-5<br>PE=1 SV=1                     | tr O16462 O16462_CAEEL      | 0 | 1 |
| Ribosomal Protein, Small subunit<br>OS=Caenorhabditis elegans GN=rps-18<br>PE=1 SV=1                    | tr O18240 O18240_CAEEL      | 0 | 1 |
| PERMeable eggshell OS=Caenorhabditis<br>elegans GN=perm-2 PE=1 SV=2                                     | tr O44145 O44145_CAEEL      | 0 | 1 |
| GRoundhog (Hedgehog-like family)<br>OS=Caenorhabditis elegans GN=grd-10<br>PE=1 SV=1                    | tr O44471 O44471_CAEEL      | 0 | 1 |
| LAMinin related. See also lmb<br>OS=Caenorhabditis elegans GN=lam-1<br>PE=1 SV=3                        | tr O44565 O44565_CAEEL      | 0 | 1 |
| C-type LECTin OS=Caenorhabditis elegans<br>GN=clec-63 PE=1 SV=1                                         | tr O45444 O45444_CAEEL      | 0 | 1 |
| Uncharacterized protein OS=Caenorhabditis<br>elegans GN=CELE_F45H10.2 PE=1 SV=1                         | tr O45525 O45525_CAEEL (+1) | 0 | 1 |
| Uncharacterized protein OS=Caenorhabditis<br>elegans GN=CELE_T12D8.5 PE=1 SV=2                          | tr O45783 O45783_CAEEL      | 0 | 1 |
| TransThyretin-Related family domain<br>OS=Caenorhabditis elegans GN=ttr-51<br>PE=1 SV=2                 | tr O62289 O62289_CAEEL      | 0 | 1 |
| COLlagen OS=Caenorhabditis elegans<br>GN=col-73 PE=1 SV=1                                               | tr P91250 P91250_CAEEL      | 0 | 1 |
| Uncharacterized protein OS=Caenorhabditis<br>elegans GN=unc-44 PE=1 SV=2                                | tr Q17489 Q17489_CAEEL      | 0 | 1 |
| FUS/TLS RNA binding protein homolog<br>OS=Caenorhabditis elegans GN=fust-1<br>PE=1 SV=2                 | tr Q18265 Q18265_CAEEL      | 0 | 1 |
| Related to yeast Vacuolar Protein Sorting<br>factor OS=Caenorhabditis elegans GN=vps-<br>32.1 PE=1 SV=1 | tr Q18886 Q18886_CAEEL      | 0 | 1 |
| Uncharacterized protein OS=Caenorhabditis<br>elegans GN=CELE_F52A8.1 PE=1 SV=1                          | tr Q20637 Q20637_CAEEL      | 0 | 1 |
| Uncharacterized protein OS=Caenorhabditis<br>elegans GN=CELE_K02F3.9 PE=1 SV=1                          | tr Q21151 Q21151_CAEEL      | 0 | 1 |
| Sperm-Specific family, class Q<br>OS=Caenorhabditis elegans GN=ssq-1<br>PE=1 SV=1                       | tr Q21294 Q21294_CAEEL      | 0 | 1 |
| Peptidyl-prolyl cis-trans isomerase<br>OS=Caenorhabditis elegans GN=FKBP-2<br>PE=2 SV=1                 | tr Q27462 Q27462_CAEEL (+1) | 0 | 1 |
| Dauer or Aging adult Overexpression<br>OS=Caenorhabditis elegans GN=dao-2<br>PE=1 SV=1                  | tr Q86LS4 Q86LS4_CAEEL      | 0 | 1 |
| TransThyretin-Related family domain<br>OS=Caenorhabditis elegans GN=ttr-41<br>PE=1 SV=1                 | tr Q86NH9 Q86NH9_CAEEL      | 0 | 1 |
| Uncharacterized protein OS=Caenorhabditis<br>elegans GN=CELE_F56C9.11 PE=4 SV=2                         | tr Q8WQE8 Q8WQE8_CAEEL      | 0 | 1 |
| Nucleoside diphosphate kinase<br>OS=Caenorhabditis elegans GN=ndk-1<br>PE=1 SV=1                        | tr Q93576 Q93576_CAEEL      | 0 | 1 |

|                                                                                                              |                            |   |    |
|--------------------------------------------------------------------------------------------------------------|----------------------------|---|----|
| Vacuolar H ATPase OS=Caenorhabditis elegans GN=vha-8 PE=1 SV=1                                               | tr Q95X44 Q95X44_CAEEL     | 0 | 1  |
| Tubulin folding Cofactor A homolog OS=Caenorhabditis elegans GN=tbca-1 PE=1 SV=1                             | tr Q95XR1 Q95XR1_CAEEL     | 0 | 1  |
| Uncharacterized protein OS=Caenorhabditis elegans GN=CELE_Y22D7AR.10 PE=1 SV=1                               | tr Q9BKK4 Q9BKK4_CAEEL     | 0 | 1  |
| GLutaRedoXin OS=Caenorhabditis elegans GN=glrx-10 PE=1 SV=1                                                  | tr Q9N456 Q9N456_CAEEL     | 0 | 1  |
| Uncharacterized protein OS=Caenorhabditis elegans GN=CELE_H20J04.1 PE=4 SV=1                                 | tr Q9N5L7 Q9N5L7_CAEEL     | 0 | 1  |
| MBF (Multiprotein bridging factor) transcriptional coactivator OS=Caenorhabditis elegans GN=mbf-1 PE=1 SV=1  | tr Q9XTV4 Q9XTV4_CAEEL     | 0 | 1  |
| Uncharacterized protein OS=Caenorhabditis elegans GN=C06C6.6 PE=4 SV=1                                       | tr O62032 O62032_CAEEL     | 0 | 1  |
| Fatty-acid and retinol-binding protein 1 OS=Caenorhabditis elegans GN=far-1 PE=3 SV=1                        | sp P34382 FAR1_CAEEL       | 1 | 18 |
| Uncharacterized protein OS=Caenorhabditis elegans GN=CELE_K08D12.3 PE=1 SV=1                                 | tr Q966I7 Q966I7_CAEEL     | 1 | 7  |
| G Protein, Gamma subunit OS=Caenorhabditis elegans GN=gpc-2 PE=1 SV=1                                        | tr G5ECT6 G5ECT6_CAEEL     | 1 | 6  |
| Uncharacterized protein OS=Caenorhabditis elegans GN=CELE_ZC373.2 PE=1 SV=2                                  | tr Q23258 Q23258_CAEEL     | 1 | 5  |
| Uncharacterized protein OS=Caenorhabditis elegans GN=CELE_Y44A6D.2 PE=1 SV=1                                 | tr Q9XXE2 Q9XXE2_CAEEL     | 1 | 5  |
| CALumenin (Calcium-binding protein) homolog OS=Caenorhabditis elegans GN=calu-1 PE=1 SV=1                    | tr G5EBH7 G5EBH7_CAEEL     | 1 | 4  |
| Histone H2A OS=Caenorhabditis elegans GN=his-3 PE=1 SV=2                                                     | sp P09588 H2A_CAEEL (+3)   | 1 | 4  |
| Elongation factor 1-alpha OS=Caenorhabditis elegans GN=eft-3 PE=3 SV=1                                       | sp P53013 EF1A_CAEEL (+1)  | 1 | 4  |
| ATP synthase subunit delta, mitochondrial OS=Caenorhabditis elegans GN=F58F12.1 PE=1 SV=1                    | sp Q09544 ATPD_CAEEL       | 1 | 3  |
| Mitochondrial import inner membrane translocase subunit tim-13 OS=Caenorhabditis elegans GN=tin-13 PE=3 SV=1 | sp O45319 TIM13_CAEEL      | 1 | 3  |
| Ferritin OS=Caenorhabditis elegans GN=ftn-2 PE=1 SV=1                                                        | tr Q9TYS3 Q9TYS3_CAEEL     | 1 | 3  |
| Cytochrome c 2.1 OS=Caenorhabditis elegans GN=cyc-2.1 PE=1 SV=2                                              | sp P19974 CYC21_CAEEL      | 1 | 3  |
| Cytochrome b-c1 complex subunit Rieske, mitochondrial OS=Caenorhabditis elegans GN=isp-1 PE=1 SV=1           | tr O44512 O44512_CAEEL     | 1 | 2  |
| Calponin Homology Domain containing Protein OS=Caenorhabditis elegans GN=chdp-1 PE=1 SV=1                    | tr P91027 P91027_CAEEL     | 1 | 2  |
| Basement membrane proteoglycan                                                                               | sp Q06561 UNC52_CAEEL (+8) | 1 | 2  |

|                                                                                                                     |                             |   |    |  |
|---------------------------------------------------------------------------------------------------------------------|-----------------------------|---|----|--|
| OS=Caenorhabditis elegans GN=unc-52<br>PE=1 SV=2                                                                    |                             |   |    |  |
| Adenosine Deaminase acting on RNA<br>OS=Caenorhabditis elegans GN=adr-1<br>PE=1 SV=1                                | tr Q86GC2 Q86GC2_CAEEL (+5) | 1 | 2  |  |
| Aspartic protease 6 OS=Caenorhabditis<br>elegans GN=asp-6 PE=3 SV=1                                                 | sp O01530 ASP6_CAEEL        | 1 | 2  |  |
| Probable prefoldin subunit 4<br>OS=Caenorhabditis elegans GN=pfd-4<br>PE=2 SV=1                                     | sp Q17435 PFD4_CAEEL        | 1 | 2  |  |
| Mitochondrial import inner membrane<br>translocase subunit tim-8<br>OS=Caenorhabditis elegans GN=tim-8<br>PE=3 SV=1 | sp Q9N408 TIM8_CAEEL        | 1 | 2  |  |
| Uncharacterized protein OS=Caenorhabditis<br>elegans GN=oxy-5 PE=1 SV=1                                             | tr A7DT45 A7DT45_CAEEL      | 1 | 2  |  |
| Uncharacterized protein OS=Caenorhabditis<br>elegans GN=CELE_W05H9.1 PE=1 SV=1                                      | tr Q23179 Q23179_CAEEL      | 1 | 2  |  |
| Uncharacterized protein OS=Caenorhabditis<br>elegans GN=C45B2.1 PE=1 SV=1                                           | tr Q95YC6 Q95YC6_CAEEL      | 1 | 2  |  |
| LiPid Depleted OS=Caenorhabditis elegans<br>GN=lpd-5 PE=1 SV=2                                                      | tr Q9N4L8 Q9N4L8_CAEEL      | 1 | 2  |  |
| Neuropeptide-Like Protein<br>OS=Caenorhabditis elegans GN=nlp-40<br>PE=1 SV=1                                       | tr Q9N4D8 Q9N4D8_CAEEL (+1) | 1 | 2  |  |
| Uncharacterized protein OS=Caenorhabditis<br>elegans GN=CELE_D1086.10 PE=1 SV=1                                     | tr B1Q273 B1Q273_CAEEL (+1) | 1 | 1  |  |
| PERMeable eggshell OS=Caenorhabditis<br>elegans GN=perm-4 PE=1 SV=2                                                 | tr O44144 O44144_CAEEL      | 1 | 1  |  |
| C. Elegans Y-box OS=Caenorhabditis<br>elegans GN=cey-1 PE=1 SV=1                                                    | tr O62213 O62213_CAEEL      | 1 | 1  |  |
| Glycine Rich Secreted Protein<br>OS=Caenorhabditis elegans GN=grsp-4<br>PE=1 SV=1                                   | tr P91207 P91207_CAEEL      | 1 | 1  |  |
| Homologous to Drosophila SQD (Squid)<br>protein OS=Caenorhabditis elegans<br>GN=sqd-1 PE=1 SV=1                     | tr Q4W5P0 Q4W5P0_CAEEL (+1) | 1 | 1  |  |
| Muscle M-line assembly protein unc-89<br>OS=Caenorhabditis elegans GN=unc-89<br>PE=1 SV=3                           | sp O01761 UNC89_CAEEL       | 1 | 0  |  |
| Uncharacterized protein ZK632.9<br>OS=Caenorhabditis elegans GN=ZK632.9<br>PE=4 SV=3                                | sp P34654 YOT9_CAEEL        | 1 | 0  |  |
| Probable small nuclear ribonucleoprotein G<br>OS=Caenorhabditis elegans GN=snr-7<br>PE=3 SV=1                       | sp Q9N4G9 RUXG_CAEEL        | 1 | 0  |  |
| Uncharacterized protein OS=Caenorhabditis<br>elegans GN=CELE_F44E5.4 PE=1 SV=1                                      | tr G5ECU5 G5ECU5_CAEEL (+1) | 1 | 0  |  |
| Uncharacterized protein OS=Caenorhabditis<br>elegans GN=CELE_T28C6.7 PE=1 SV=5                                      | tr Q22847 Q22847_CAEEL (+1) | 1 | 0  |  |
| Heat Shock factor Binding protein<br>OS=Caenorhabditis elegans GN=hsb-1<br>PE=1 SV=1                                | tr Q9U3B7 Q9U3B7_CAEEL      | 1 | 0  |  |
| Actin-3 OS=Caenorhabditis elegans<br>GN=act-3 PE=1 SV=1                                                             | sp P0DM42 ACT3_CAEEL (+4)   | 2 | 10 |  |
| Uncharacterized protein OS=Caenorhabditis                                                                           | tr O02267 O02267_CAEEL      | 2 | 7  |  |

|                                                                                                      |                             |   |    |
|------------------------------------------------------------------------------------------------------|-----------------------------|---|----|
| elegans GN=CELE_F45H10.3 PE=1 SV=1                                                                   |                             |   |    |
| SaPosin-like Protein family<br>OS=Caenorhabditis elegans GN=spp-5<br>PE=1 SV=1                       | tr Q86FL8 Q86FL8_CAEEL      | 2 | 6  |
| SaPosin-like Protein family<br>OS=Caenorhabditis elegans GN=spp-2<br>PE=1 SV=1                       | tr Q8MPX7 Q8MPX7_CAEEL      | 2 | 6  |
| ASpartyl Protease OS=Caenorhabditis<br>elegans GN=asp-1 PE=1 SV=1                                    | tr G5EEI4 G5EEI4_CAEEL (+1) | 2 | 5  |
| Nematode Polyprotein Allergen related<br>OS=Caenorhabditis elegans GN=npa-1<br>PE=1 SV=1             | tr G5EF32 G5EF32_CAEEL      | 2 | 4  |
| 60S acidic ribosomal protein P1<br>OS=Caenorhabditis elegans GN=rla-1 PE=3<br>SV=2                   | sp P91913 RLA1_CAEEL        | 2 | 4  |
| Uncharacterized protein OS=Caenorhabditis<br>elegans GN=CELE_F42A10.5 PE=1 SV=1                      | tr Q20310 Q20310_CAEEL      | 2 | 3  |
| Uncharacterized protein OS=Caenorhabditis<br>elegans GN=CELE_T24B8.3 PE=1 SV=2                       | tr Q22719 Q22719_CAEEL (+1) | 2 | 2  |
| RNA-binding protein 8A OS=Caenorhabditis<br>elegans GN=rnp-4 PE=1 SV=1                               | tr Q21832 Q21832_CAEEL      | 2 | 0  |
| UPF0375 protein C08F11.11<br>OS=Caenorhabditis elegans<br>GN=C08F11.11 PE=1 SV=1                     | sp O62053 U375A_CAEEL       | 3 | 8  |
| 40S ribosomal protein S28<br>OS=Caenorhabditis elegans GN=rps-28<br>PE=3 SV=1                        | sp Q95Y04 RS28_CAEEL        | 3 | 6  |
| FIP (Fungus-Induced Protein) Related<br>OS=Caenorhabditis elegans GN=fipr-21<br>PE=1 SV=1            | tr Q20277 Q20277_CAEEL      | 3 | 6  |
| Uncharacterized protein OS=Caenorhabditis<br>elegans GN=CELE_F40F8.5 PE=1 SV=1                       | tr H2L2A1 H2L2A1_CAEEL      | 3 | 4  |
| Uncharacterized protein F08B12.4<br>OS=Caenorhabditis elegans GN=F08B12.4<br>PE=4 SV=2               | sp Q19191 YZ10_CAEEL (+1)   | 3 | 1  |
| Uncharacterized protein OS=Caenorhabditis<br>elegans GN=CELE_F09D12.2 PE=4 SV=1                      | tr O44472 O44472_CAEEL      | 3 | 0  |
| Copine family protein 2 OS=Caenorhabditis<br>elegans GN=cpna-2 PE=2 SV=4                             | sp Q09221 CPNA2_CAEEL       | 3 | 0  |
| Uncharacterized protein OS=Caenorhabditis<br>elegans GN=CELE_T02B11.8 PE=4 SV=1                      | tr Q1XFZ1 Q1XFZ1_CAEEL      | 3 | 0  |
| 60S acidic ribosomal protein P2<br>OS=Caenorhabditis elegans GN=rpa-2<br>PE=3 SV=2                   | sp O01504 RLA2_CAEEL        | 4 | 18 |
| Acyl-CoA-binding protein homolog 1<br>OS=Caenorhabditis elegans GN=acbp-1<br>PE=3 SV=1               | sp O01805 ACBP1_CAEEL       | 4 | 11 |
| Transcription factor BTF3 homolog<br>OS=Caenorhabditis elegans GN=icd-1<br>PE=1 SV=1                 | sp Q18885 BTF3_CAEEL        | 4 | 11 |
| ATPase inhibitor mai-2, mitochondrial<br>OS=Caenorhabditis elegans GN=mai-2<br>PE=3 SV=1             | sp O44441 ATIF2_CAEEL       | 4 | 9  |
| DAF-16/FOXO Controlled, germline Tumor<br>affecting OS=Caenorhabditis elegans<br>GN=dct-16 PE=1 SV=1 | tr Q9XX57 Q9XX57_CAEEL      | 4 | 8  |

|                                                                                            |                                |    |    |
|--------------------------------------------------------------------------------------------|--------------------------------|----|----|
| Uncharacterized protein OS=Caenorhabditis elegans GN=CELE_K03E5.2 PE=1 SV=2                | tr O61848 O61848_CAEEL         | 4  | 5  |
| Protein unc-87 OS=Caenorhabditis elegans GN=unc-87 PE=1 SV=3                               | sp P37806 UNC87_CAEEL (+1)     | 5  | 30 |
| Troponin T OS=Caenorhabditis elegans GN=mup-2 PE=2 SV=1                                    | sp Q27371 TNNT_CAEEL           | 5  | 26 |
| Uncharacterized protein C53C9.2 OS=Caenorhabditis elegans GN=C53C9.2 PE=3 SV=2             | sp Q09936 YSE2_CAEEL           | 5  | 6  |
| TropoNin T OS=Caenorhabditis elegans GN=tnt-2 PE=1 SV=1                                    | tr Q7Z072 Q7Z072_CAEEL         | 6  | 29 |
| Uncharacterized protein OS=Caenorhabditis elegans GN=C06A8.3 PE=1 SV=1                     | tr Q17698 Q17698_CAEEL         | 6  | 19 |
| 40S ribosomal protein S12 OS=Caenorhabditis elegans GN=rps-12 PE=3 SV=2                    | sp P49196 RS12_CAEEL           | 6  | 14 |
| Prion-like-(Q/N-rich)-domain-bearing protein OS=Caenorhabditis elegans GN=pqn-59 PE=1 SV=2 | tr O61708 O61708_CAEEL         | 6  | 3  |
| Myosin regulatory light chain 2 OS=Caenorhabditis elegans GN=mlc-2 PE=3 SV=1               | sp P19626 MLR2_CAEEL           | 6  | 1  |
| ATP synthase subunit OS=Caenorhabditis elegans GN=atp-5 PE=1 SV=2                          | tr Q17763 Q17763_CAEEL         | 7  | 20 |
| ATP synthase subunit OS=Caenorhabditis elegans GN=atp-4 PE=1 SV=1                          | tr O16517 O16517_CAEEL         | 8  | 27 |
| 40S ribosomal protein S21 OS=Caenorhabditis elegans GN=rps-21 PE=1 SV=1                    | sp P49197 RS21_CAEEL           | 8  | 13 |
| Plant Late Embryo Abundant (LEA) related OS=Caenorhabditis elegans GN=lea-1 PE=1 SV=1      | tr G5EEF0 G5EEF0_CAEEL (+7)    | 10 | 0  |
| Uncharacterized protein OS=Caenorhabditis elegans GN=lev-11 PE=1 SV=1                      | tr A0A0K3ARB5 A0A0K3ARB5_CAEEL | 15 | 38 |
| ProGRaNulin homolog OS=Caenorhabditis elegans GN=pgrn-1 PE=1 SV=1                          | tr Q9U362 Q9U362_CAEEL         | 19 | 16 |
| Myosin, essential light chain OS=Caenorhabditis elegans GN=mlc-3 PE=3 SV=1                 | sp P53014 MLE_CAEEL (+1)       | 22 | 35 |
| CaLponIn-like proteins OS=Caenorhabditis elegans GN=clik-1 PE=1 SV=1                       | tr Q23050 Q23050_CAEEL         | 26 | 49 |
| Tropomyosin isoforms a/b/d/f OS=Caenorhabditis elegans GN=lev-11 PE=1 SV=1                 | sp Q22866 TPM1_CAEEL           | 36 | 76 |

---

**Supplementary Table 4.** Gene ontology (GO) enrichment analysis of proteins co-immunoprecipitated with  $\alpha$ -synuclein from *C. elegans* lysates. The biological processes are ranked by fold enrichment within the GO over-representation analysis of biological processes using PANTHER “GO biological process complete” ([pantherdb.org/geneListAnalysis.do](http://pantherdb.org/geneListAnalysis.do)). The *C. elegans* genome was used as the reference list. Only biological processes with a false discovery rate (FDR)  $\leq 0.05$  are listed.

| <b>Biological Process</b>                      | <b>Gene Ontology Term</b> | <b># of Genes from Input</b> | <b># of Genes Expected</b> | <b>Fold Enrichment</b> |
|------------------------------------------------|---------------------------|------------------------------|----------------------------|------------------------|
| 'De novo' protein folding                      | (GO:0006458)              | 4                            | 0.09                       | 45.17                  |
| Chaperone cofactor-dependent protein refolding | (GO:0051085)              | 3                            | 0.08                       | 35.87                  |
| 'De novo' posttranslational protein folding    | (GO:0051084)              | 3                            | 0.08                       | 35.87                  |
| Protein folding                                | (GO:0006457)              | 6                            | 0.46                       | 13.11                  |
| ATP metabolic process                          | (GO:0046034)              | 6                            | 0.52                       | 11.62                  |
| Translation                                    | (GO:0006412)              | 9                            | 1.29                       | 6.98                   |
| Peptide biosynthetic process                   | (GO:0043043)              | 9                            | 1.31                       | 6.85                   |
| Peptide metabolic process                      | (GO:0006518)              | 10                           | 1.57                       | 6.35                   |
| Cellular protein-containing complex assembly   | (GO:0034622)              | 9                            | 1.45                       | 6.22                   |
| Amide biosynthetic process                     | (GO:0043604)              | 9                            | 1.46                       | 6.18                   |
| Cytoskeleton organization                      | (GO:0007010)              | 9                            | 1.54                       | 5.84                   |
| Cellular amide metabolic process               | (GO:0043603)              | 10                           | 1.97                       | 5.08                   |
| Protein-containing complex assembly            | (GO:0065003)              | 9                            | 1.79                       | 5.04                   |
| Organelle organization                         | (GO:0006996)              | 17                           | 5.39                       | 3.15                   |
| Cellular component organization or biogenesis  | (GO:0071840)              | 24                           | 8.43                       | 2.85                   |
| Cellular component organization                | (GO:0016043)              | 22                           | 7.83                       | 2.81                   |



**Supplementary Table 5.** Known entities are compounds previously shown to reduce  $\alpha$ -synuclein oligomers in cell or animal models in hypothesis-driven studies (see references). The corresponding number of abstracts of published abstracts identified and used by IBM Watson for Drug Discovery Predictive Analytics for each drug on the date of ranking is provided.

| <b>Drug Name</b>                 | <b># of Abstracts</b> |
|----------------------------------|-----------------------|
| 17-AAG <sup>21,48,49,61,65</sup> | 816                   |
| AICAR <sup>56</sup>              | 446                   |
| Anle183b <sup>59</sup>           | 5                     |
| Baicalein <sup>57</sup>          | 1000                  |
| Curcumin <sup>58</sup>           | 1000                  |
| Cyclosporine <sup>49</sup>       | 1000                  |
| Geldanamycin <sup>54</sup>       | 1000                  |
| Isorhynchophylline <sup>60</sup> | 51                    |
| Myricetin <sup>58</sup>          | 1000                  |
| PD169316 <sup>49</sup>           | 176                   |
| Resveratrol <sup>56</sup>        | 1687                  |
| Rosmarinic acid <sup>58</sup>    | 1021                  |
| SB239063 <sup>49</sup>           | 122                   |
| Tacrolimus <sup>55</sup>         | 1000                  |
| TBBz <sup>49</sup>               | 19                    |

**Supplementary Table 6.** *In silico* ranking of compounds by IBM Watson for Drug Discovery Predictive Analytics based on their likelihood of inhibiting  $\alpha$ -synuclein aggregation. Candidate entities (N=620) are oral medications currently prescribed for treatment of various human diseases and listed in the Ontario Drug Benefit Program formulary (formulary.health.gov.on.ca/formulary/). Known entities (N=15) are in bold. Ranking is shown for each of the known entities when removed from the known set and added to the candidate set during leave-one-out validation analysis. Compounds highlighted in blue were selected for testing *in vitro*.

| <b>Drug Name</b>          | <b>IBM Watson Ranking</b> | <b>Score (arbitrary)</b> |
|---------------------------|---------------------------|--------------------------|
| <b>Curcumin</b>           |                           | <b>0.026572896</b>       |
| <b>Resveratrol</b>        |                           | <b>0.024891593</b>       |
| Verapamil                 | 1                         | 0.02391447               |
| Tretinoin                 | 2                         | 0.023665065              |
| Caffeine                  | 3                         | 0.02212228               |
| Dexamethasone             | 4                         | 0.021293124              |
| <b>PD169316</b>           |                           | <b>0.020369345</b>       |
| <b>SB239063</b>           |                           | <b>0.020314941</b>       |
| Sirolimus                 | 5                         | 0.019989299              |
| Indomethacin              | 6                         | 0.019799477              |
| Etoposide                 | 7                         | 0.019230978              |
| <b>Baicalein</b>          |                           | <b>0.018408176</b>       |
| <b>Geldanamycin</b>       |                           | <b>0.018190702</b>       |
| Estradiol                 | 8                         | 0.018186088              |
| Celecoxib                 | 9                         | 0.017885722              |
| Framycetin                | 10                        | 0.016386577              |
| <b>17-AAG</b>             |                           | <b>0.013898701</b>       |
| <b>Isorhynchophylline</b> |                           | <b>0.01359914</b>        |
| <b>TBBz</b>               |                           | <b>0.011656517</b>       |
| <b>Myricetin</b>          |                           | <b>0.011613904</b>       |
| <b>Rosmarinic acid</b>    |                           | <b>0.011587948</b>       |
| Sulindac                  | 11                        | 0.01155053               |
| Tamoxifen                 | 12                        | 0.01073828               |
| <b>Cyclosporine</b>       |                           | <b>0.010528345</b>       |
| Piroxicam                 | 13                        | 0.010327113              |
| Minocycline               | 14                        | 0.01029561               |
| Ketoconazole              | 15                        | 0.010211005              |
| Alitretinoin              | 16                        | 0.009433155              |
| <b>AICAR</b>              |                           | <b>0.009317443</b>       |
| Lovastatin                | 17                        | 0.009266705              |
| Erlotinib                 | 18                        | 0.009241609              |
| Ascorbic acid             | 19                        | 0.009162541              |
| Flurbiprofen              | 20                        | 0.008901568              |
| Tetracycline              | 21                        | 0.00810332               |

|                     |    |                    |
|---------------------|----|--------------------|
| Naproxen            | 22 | 0.007928475        |
| Propranolol         | 23 | 0.007212216        |
| Temozolomide        | 24 | 0.006998555        |
| Sennosides          | 25 | 0.006921414        |
| Imatinib            | 26 | 0.006875301        |
| Allopurinol         | 27 | 0.006825175        |
| Galantamine         | 28 | 0.00679403         |
| Rifabutin           | 29 | 0.006793076        |
| Calcitriol          | 30 | 0.006743945        |
| Vincristine         | 31 | 0.006730485        |
| Pioglitazone        | 32 | 0.00670246         |
| Mercaptopurine      | 33 | 0.006681412        |
| Melphalan           | 34 | 0.006625598        |
| Losartan            | 35 | 0.006591429        |
| Ibuprofen           | 36 | 0.006536924        |
| Theophylline        | 37 | 0.006147827        |
| Acetaminophen       | 38 | 0.00607345         |
| Hydrocortisone      | 39 | 0.005921451        |
| Pseudoephedrine     | 40 | 0.005077118        |
| Collagenase         | 41 | 0.004775753        |
| Auranofin           | 42 | 0.004727561        |
| Pentoxifylline      | 43 | 0.004670313        |
| Miconazole          | 44 | 0.004667356        |
| Polyethylene glycol | 45 | 0.004591185        |
| <b>Anle183b</b>     |    | <b>0.004580211</b> |
| Ferrous sulfate     | 46 | 0.004574955        |
| Mycophenolate       | 47 | 0.004554131        |
| Filgrastim          | 48 | 0.004544292        |
| Donepezil           | 49 | 0.004538387        |
| Fenofibrate         | 50 | 0.004521217        |
| Leflunomide         | 51 | 0.00451132         |
| Simvastatin         | 52 | 0.004507803        |
| Ganciclovir         | 53 | 0.004500985        |
| Fludarabine         | 54 | 0.004491515        |
| Memantine           | 55 | 0.004487818        |
| Chlorambucil        | 56 | 0.004487548        |
| Rasagiline          | 57 | 0.004482605        |
| Selegiline          | 58 | 0.004472337        |
| Busulfan            | 59 | 0.004456739        |
| Valganciclovir      | 60 | 0.004424035        |
| Ursodiol            | 61 | 0.004421451        |
| Nifedipine          | 62 | 0.004411532        |
| Scopolamine         | 63 | 0.004410799        |
| Adalimumab          | 64 | 0.004402775        |
| Cinacalcet          | 65 | 0.004400428        |

|                                 |     |             |
|---------------------------------|-----|-------------|
| Fluvastatin                     | 66  | 0.004397216 |
| Infliximab                      | 67  | 0.004393745 |
| Ethinyl estradiol               | 68  | 0.004356137 |
| Cyclophosphamide                | 69  | 0.004347513 |
| 5-aminosalicylic acid           | 70  | 0.0043463   |
| Azathioprine                    | 71  | 0.004340647 |
| Telmisartan                     | 72  | 0.004332182 |
| Ketoprofen                      | 73  | 0.004315727 |
| Methotrexate                    | 74  | 0.004306706 |
| Acyclovir                       | 75  | 0.004302158 |
| Valacyclovir                    | 76  | 0.004300905 |
| Pimecrolimus                    | 77  | 0.004245589 |
| Prednisolone                    | 78  | 0.004164329 |
| Prednisone                      | 79  | 0.004105229 |
| Methylprednisolone              | 80  | 0.004085007 |
| Fluorouracil                    | 81  | 0.002607249 |
| Clotrimazole                    | 82  | 0.002584098 |
| Tryptophan                      | 83  | 0.002567123 |
| Ferrous fumarate                | 84  | 0.002503152 |
| Dantrolene                      | 85  | 0.00250279  |
| Polystyrene sodium<br>sulfonate | 86  | 0.002495491 |
| Nimodipine                      | 87  | 0.002493982 |
| Trifluoperazine                 | 88  | 0.002492626 |
| Thioguanine                     | 89  | 0.002487549 |
| Bicalutamide                    | 90  | 0.00246725  |
| Glucagon                        | 91  | 0.002465363 |
| Nicotinic acid                  | 92  | 0.002461031 |
| Carbachol                       | 93  | 0.00244903  |
| Daunorubicin                    | 94  | 0.002444007 |
| Mebendazole                     | 95  | 0.002439156 |
| Riluzole                        | 96  | 0.002413749 |
| Pyridoxine                      | 97  | 0.002399361 |
| Sodium<br>aurothiomalate        | 98  | 0.00238003  |
| Polyvinylpyrrolidone            | 99  | 0.00237589  |
| Bezafibrate                     | 100 | 0.002367541 |
| Clodronate                      | 101 | 0.002355484 |
| Atropine                        | 102 | 0.002354346 |
| Methoxsalen                     | 103 | 0.002343206 |
| Diltiazem                       | 104 | 0.002334782 |
| Digoxin                         | 105 | 0.00232269  |
| Dipyridamole                    | 106 | 0.00232206  |
| Dextromethorphan                | 107 | 0.002320006 |
| Rivastigmine                    | 108 | 0.002317793 |

|                      |     |                    |
|----------------------|-----|--------------------|
| Procarbazine         | 109 | 0.002315562        |
| Hydroxyurea          | 110 | 0.002312519        |
| Amantadine           | 111 | 0.002303632        |
| Sulfasalazine        | 112 | 0.002296055        |
| Metformin            | 113 | 0.00228144         |
| Etanercept           | 114 | 0.002281027        |
| Penicillamine        | 115 | 0.002280191        |
| Doxycycline          | 116 | 0.002279374        |
| Fusidic acid         | 117 | 0.002278715        |
| Candesartan          | 118 | 0.002277497        |
| Carbidopa            | 119 | 0.00227743         |
| Clobetasol           | 120 | 0.002272162        |
| Imiquimod            | 121 | 0.002272057        |
| Pamidronate          | 122 | 0.002268646        |
| Probenecid           | 123 | 0.002267309        |
| Benserazide          | 124 | 0.002266379        |
| Pramipexole          | 125 | 0.002266219        |
| Trihexyphenidyl      | 126 | 0.00226031         |
| <b>Tacrolimus</b>    |     | <b>0.002258231</b> |
| Acitretin            | 127 | 0.002254541        |
| Levodopa             | 128 | 0.002248402        |
| Betamethasone        | 129 | 0.00224665         |
| Secukinumab          | 130 | 0.002234528        |
| Pilocarpine          | 131 | 0.002228631        |
| Hydroxychloroquine   | 132 | 0.002228131        |
| Olsalazine           | 133 | 0.00222565         |
| Calcipotriol         | 134 | 0.002216495        |
| Interferon alfa-2b   | 135 | 0.002206356        |
| Codeine              | 136 | 0.002201571        |
| Ustekinumab          | 137 | 0.00219197         |
| Pancrelipase         | 138 | 0.00219166         |
| Epoetin alfa         | 139 | 0.002170286        |
| Epinephrine          | 140 | 0.002165059        |
| Amphotericin b       | 141 | 0.002147183        |
| Metoclopramide       | 142 | 0.00212225         |
| Clonazepam           | 143 | 0.002122124        |
| Diazepam             | 144 | 0.002083002        |
| Acetylsalicylic acid | 145 | 4.36E-04           |
| Clofibrate           | 146 | 4.23E-04           |
| Zinc                 | 147 | 4.06E-04           |
| Methimazole          | 148 | 3.82E-04           |
| Methylcellulose      | 149 | 3.78E-04           |
| Isotretinoin         | 150 | 3.56E-04           |
| Sodium citrate       | 151 | 3.54E-04           |
| Trifluridine         | 152 | 3.51E-04           |

|                      |     |          |
|----------------------|-----|----------|
| Mefenamic acid       | 153 | 3.47E-04 |
| Meloxicam            | 154 | 3.42E-04 |
| Thiamine             | 155 | 3.28E-04 |
| Nystatin             | 156 | 3.26E-04 |
| Gramicidin           | 157 | 3.25E-04 |
| Etodolac             | 158 | 3.21E-04 |
| Cholecalciferol      | 159 | 3.20E-04 |
| Citric acid          | 160 | 3.20E-04 |
| Mineral oil          | 161 | 3.17E-04 |
| Insulin              | 162 | 3.12E-04 |
| Calcitonin           | 163 | 3.07E-04 |
| Calcium              | 164 | 3.06E-04 |
| Propylthiouracil     | 165 | 3.05E-04 |
| Tiaprofenic acid     | 166 | 3.04E-04 |
| Piperonyl butoxide   | 167 | 3.01E-04 |
| Amiloride            | 168 | 2.98E-04 |
| Lanreotide           | 169 | 2.90E-04 |
| Atenolol             | 170 | 2.84E-04 |
| Sulfinpyrazone       | 171 | 2.83E-04 |
| Oxaprozin            | 172 | 2.83E-04 |
| Conjugated estrogens | 173 | 2.80E-04 |
| Diclofenac           | 174 | 2.80E-04 |
| Folic acid           | 175 | 2.80E-04 |
| Lomustine            | 176 | 2.69E-04 |
| Glyburide            | 177 | 2.64E-04 |
| Atovaquone           | 178 | 2.62E-04 |
| Metoprolol           | 179 | 2.60E-04 |
| Estropipate          | 180 | 2.60E-04 |
| Permethrin           | 181 | 2.59E-04 |
| Altretamine          | 182 | 2.55E-04 |
| Flumethasone         | 183 | 2.53E-04 |
| Pyrethrins           | 184 | 2.51E-04 |
| Leucovorin           | 185 | 2.50E-04 |
| Etidronate           | 186 | 2.50E-04 |
| Progesterone         | 187 | 2.48E-04 |
| Bethanechol          | 188 | 2.48E-04 |
| Alendronate          | 189 | 2.46E-04 |
| Nabumetone           | 190 | 2.43E-04 |
| Octreotide           | 191 | 2.42E-04 |
| Desmopressin         | 192 | 2.41E-04 |
| Azelaic acid         | 193 | 2.38E-04 |
| Ergocalciferol       | 194 | 2.36E-04 |
| Flutamide            | 195 | 2.35E-04 |
| Trimebutine          | 196 | 2.34E-04 |

|                     |     |          |
|---------------------|-----|----------|
| Zoledronic acid     | 197 | 2.32E-04 |
| Capecitabine        | 198 | 2.30E-04 |
| Diphenhydramine     | 199 | 2.30E-04 |
| Aluminum hydroxide  | 200 | 2.29E-04 |
| Sodium biphosphate  | 201 | 2.29E-04 |
| Chloroquine         | 202 | 2.28E-04 |
| Anagrelide          | 203 | 2.26E-04 |
| Benzydamine         | 204 | 2.26E-04 |
| Flunarizine         | 205 | 2.26E-04 |
| Potassium chloride  | 206 | 2.24E-04 |
| Prazosin            | 207 | 2.24E-04 |
| Nilutamide          | 208 | 2.23E-04 |
| Estramustine        | 209 | 2.21E-04 |
| Cyanocobalamin      | 210 | 2.20E-04 |
| Polyvinyl alcohol   | 211 | 2.20E-04 |
| Dextran 70          | 212 | 2.17E-04 |
| Benzoyl peroxide    | 213 | 2.15E-04 |
| Lodoxamide          | 214 | 2.11E-04 |
| Captopril           | 215 | 2.09E-04 |
| Iodine              | 216 | 2.07E-04 |
| Alfacalcidol        | 217 | 2.07E-04 |
| Cimetidine          | 218 | 2.03E-04 |
| Cosyntropin         | 219 | 2.00E-04 |
| Megestrol           | 220 | 1.99E-04 |
| Isosorbide          | 221 | 1.97E-04 |
| Ferrous gluconate   | 222 | 1.97E-04 |
| Methazolamide       | 223 | 1.94E-04 |
| Thyroid             | 224 | 1.92E-04 |
| Risedronate         | 225 | 1.91E-04 |
| Docusate            | 226 | 1.89E-04 |
| Guaifenesin         | 227 | 1.88E-04 |
| Isopropyl myristate | 228 | 1.88E-04 |
| Misoprostol         | 229 | 1.86E-04 |
| Omeprazole          | 230 | 1.85E-04 |
| Petrolatum          | 231 | 1.84E-04 |
| Acetazolamide       | 232 | 1.82E-04 |
| Exemestane          | 233 | 1.81E-04 |
| Gemfibrozil         | 234 | 1.78E-04 |
| Pyridostigmine      | 235 | 1.75E-04 |
| Ketotifen           | 236 | 1.74E-04 |
| Sildenafil          | 237 | 1.73E-04 |
| Thyrotropin alpha   | 238 | 1.72E-04 |
| Minoxidil           | 239 | 1.72E-04 |
| Floctafenine        | 240 | 1.68E-04 |
| Quinagolide         | 241 | 1.67E-04 |

|                      |     |          |
|----------------------|-----|----------|
| Nitroglycerin        | 242 | 1.67E-04 |
| Butalbital           | 243 | 1.67E-04 |
| Bosentan             | 244 | 1.66E-04 |
| Procainamide         | 245 | 1.65E-04 |
| Phenytoin            | 246 | 1.64E-04 |
| Testosterone         | 247 | 1.63E-04 |
| Naphazoline          | 248 | 1.63E-04 |
| Loperamide           | 249 | 1.62E-04 |
| Mexiletine           | 250 | 1.62E-04 |
| Ketorolac            | 251 | 1.62E-04 |
| Flecainide           | 252 | 1.62E-04 |
| Gentamicin           | 253 | 1.61E-04 |
| Amphetamine          | 254 | 1.61E-04 |
| Sulfamethoxazole     | 255 | 1.61E-04 |
| Famotidine           | 256 | 1.59E-04 |
| Ranitidine           | 257 | 1.59E-04 |
| Sucralfate           | 258 | 1.59E-04 |
| Cholestyramine       | 259 | 1.57E-04 |
| Letrozole            | 260 | 1.53E-04 |
| Trimethoprim         | 261 | 1.53E-04 |
| Hydralazine          | 262 | 1.53E-04 |
| Penicillin           | 263 | 1.52E-04 |
| Brimonidine          | 264 | 1.49E-04 |
| Bromocriptine        | 265 | 1.49E-04 |
| Ethinodiol           | 266 | 1.49E-04 |
| Magnesium            | 267 | 1.49E-04 |
| Pantoprazole         | 268 | 1.48E-04 |
| Lidocaine            | 269 | 1.48E-04 |
| Iodochlorhydroxyquin | 270 | 1.47E-04 |
| Latanoprost          | 271 | 1.45E-04 |
| Anastrozole          | 272 | 1.45E-04 |
| Gliclazide           | 273 | 1.44E-04 |
| Benazepril           | 274 | 1.43E-04 |
| Lansoprazole         | 275 | 1.39E-04 |
| Fludrocortisone      | 276 | 1.37E-04 |
| Niacin               | 277 | 1.36E-04 |
| Eptifibatide         | 278 | 1.36E-04 |
| Montelukast          | 279 | 1.36E-04 |
| Aprepitant           | 280 | 1.36E-04 |
| Danazol              | 281 | 1.35E-04 |
| Tramadol             | 282 | 1.34E-04 |
| Felodipine           | 283 | 1.34E-04 |
| Aflibercept          | 284 | 1.32E-04 |
| Lactulose            | 285 | 1.31E-04 |
| Ethambutol           | 286 | 1.30E-04 |



|                 |     |          |
|-----------------|-----|----------|
| Ceftriaxone     | 287 | 1.30E-04 |
| Ofloxacin       | 288 | 1.29E-04 |
| Furosemide      | 289 | 1.29E-04 |
| Haloperidol     | 290 | 1.29E-04 |
| Polymyxin b     | 291 | 1.28E-04 |
| Bisacodyl       | 292 | 1.27E-04 |
| Terbinafine     | 293 | 1.26E-04 |
| Diflucortolone  | 294 | 1.25E-04 |
| Rosuvastatin    | 295 | 1.25E-04 |
| Oxtriphylline   | 296 | 1.25E-04 |
| Repaglinide     | 297 | 1.22E-04 |
| Mefloquine      | 298 | 1.21E-04 |
| Rifampin        | 299 | 1.20E-04 |
| Triamcinolone   | 300 | 1.20E-04 |
| Ciprofloxacin   | 301 | 1.20E-04 |
| Cabergoline     | 302 | 1.19E-04 |
| Clobetasone     | 303 | 1.19E-04 |
| Meclizine       | 304 | 1.19E-04 |
| Pravastatin     | 305 | 1.18E-04 |
| Neostigmine     | 306 | 1.17E-04 |
| Darifenacin     | 307 | 1.17E-04 |
| Amcinonide      | 308 | 1.17E-04 |
| Finasteride     | 309 | 1.17E-04 |
| Atorvastatin    | 310 | 1.17E-04 |
| Pyrazinamide    | 311 | 1.16E-04 |
| Tobramycin      | 312 | 1.16E-04 |
| Gabapentin      | 313 | 1.16E-04 |
| Ethopropazine   | 314 | 1.15E-04 |
| Tranlycypromine | 315 | 1.14E-04 |
| Raloxifene      | 316 | 1.14E-04 |
| Flavoxate       | 317 | 1.13E-04 |
| Ticlopidine     | 318 | 1.12E-04 |
| Ezetimibe       | 319 | 1.11E-04 |
| Disopyramide    | 320 | 1.11E-04 |
| Triptorelin     | 321 | 1.10E-04 |
| Rabeprazole     | 322 | 1.10E-04 |
| Buserelin       | 323 | 1.10E-04 |
| Orciprenaline   | 324 | 1.09E-04 |
| Amiodarone      | 325 | 1.09E-04 |
| Desonide        | 326 | 1.09E-04 |
| Betahistine     | 327 | 1.08E-04 |
| Goserelin       | 328 | 1.08E-04 |
| Saquinavir      | 329 | 1.06E-04 |
| Propafenone     | 330 | 1.06E-04 |
| Ocriplasmin     | 331 | 1.05E-04 |

|                     |     |          |
|---------------------|-----|----------|
| Nizatidine          | 332 | 1.05E-04 |
| Terconazole         | 333 | 1.05E-04 |
| Dimethicone         | 334 | 1.05E-04 |
| Bacitracin          | 335 | 1.05E-04 |
| Levonorgestrel      | 336 | 1.04E-04 |
| Denosumab           | 337 | 1.03E-04 |
| Fluorometholone     | 338 | 1.02E-04 |
| Nadolol             | 339 | 1.00E-04 |
| Zanamivir           | 340 | 1.00E-04 |
| Desipramine         | 341 | 1.00E-04 |
| Citalopram          | 342 | 9.98E-05 |
| Acarbose            | 343 | 9.97E-05 |
| Psyllium            | 344 | 9.81E-05 |
| Granisetron         | 345 | 9.74E-05 |
| Metronidazole       | 346 | 9.73E-05 |
| Clopidogrel         | 347 | 9.69E-05 |
| Nitrofurantoin      | 348 | 9.68E-05 |
| Clonidine           | 349 | 9.63E-05 |
| Amitriptyline       | 350 | 9.57E-05 |
| Famciclovir         | 351 | 9.56E-05 |
| Azithromycin        | 352 | 9.56E-05 |
| Ampicillin          | 353 | 9.55E-05 |
| Cefuroxime          | 354 | 9.55E-05 |
| Sotalol             | 355 | 9.53E-05 |
| Oxycodone           | 356 | 9.51E-05 |
| Sodium cromoglycate | 357 | 9.47E-05 |
| Proguanil           | 358 | 9.42E-05 |
| Sumatriptan         | 359 | 9.22E-05 |
| Fluconazole         | 360 | 9.21E-05 |
| Morphine            | 361 | 9.21E-05 |
| Ondansetron         | 362 | 9.16E-05 |
| Povidone            | 363 | 9.12E-05 |
| Leuprolide          | 364 | 9.10E-05 |
| Triamterene         | 365 | 9.07E-05 |
| Norgestimate        | 366 | 9.05E-05 |
| Colesevelam         | 367 | 9.05E-05 |
| Fluocinonide        | 368 | 9.00E-05 |
| Drospirenone        | 369 | 8.99E-05 |
| Acebutolol          | 370 | 8.92E-05 |
| Betaxolol           | 371 | 8.90E-05 |
| Rifaximin           | 372 | 8.89E-05 |
| Sulfadiazine        | 373 | 8.86E-05 |
| Colestipol          | 374 | 8.72E-05 |
| Norethindrone       | 375 | 8.71E-05 |
| Oseltamivir         | 376 | 8.71E-05 |

|                           |       |          |
|---------------------------|-------|----------|
| Sodium phosphate          | 377   | 8.60E-05 |
| Medroxyprogesterone       | 378   | 8.59E-05 |
| Sodium picosulfate        | 379   | 8.56E-05 |
| Dienogest                 | 380   | 8.55E-05 |
| Cyproterone               | 381   | 8.54E-05 |
| Prasugrel                 | 382.5 | 8.48E-05 |
| Ticagrelor                | 382.5 | 8.48E-05 |
| Ulipristal                | 384   | 8.45E-05 |
| Midazolam                 | 385   | 8.37E-05 |
| Tinzaparin                | 386   | 8.27E-05 |
| Valsartan                 | 387   | 8.20E-05 |
| Irbesartan                | 388   | 8.20E-05 |
| Ranibizumab               | 389   | 8.12E-05 |
| Sodium fusidate           | 390   | 8.11E-05 |
| Glimepiride               | 391   | 7.93E-05 |
| Clozapine                 | 392   | 7.90E-05 |
| Diphenoxylate             | 393   | 7.88E-05 |
| Baclofen                  | 394   | 7.87E-05 |
| Degarelix                 | 395   | 7.86E-05 |
| Cephalexin                | 396   | 7.77E-05 |
| Orphenadrine              | 397   | 7.76E-05 |
| Beclomethasone            | 398   | 7.73E-05 |
| Fluoxetine                | 399   | 7.70E-05 |
| Hydrocodone               | 400   | 7.46E-05 |
| Moxifloxacin              | 401   | 7.41E-05 |
| Brinzolamide              | 402   | 7.35E-05 |
| Norfloxacin               | 403   | 7.31E-05 |
| Botulinum toxin type<br>a | 404   | 7.27E-05 |
| Zolmitriptan              | 405   | 7.21E-05 |
| Voriconazole              | 406   | 7.13E-05 |
| Zidovudine                | 407   | 6.94E-05 |
| Dextroamphetamine         | 408   | 6.92E-05 |
| Linezolid                 | 409   | 6.92E-05 |
| Naloxone                  | 410   | 6.91E-05 |
| Doxylamine                | 411   | 6.90E-05 |
| Didanosine                | 412   | 6.88E-05 |
| Sitagliptin               | 413   | 6.83E-05 |
| Linagliptin               | 414   | 6.82E-05 |
| Tranexamic acid           | 415   | 6.82E-05 |
| Warfarin                  | 416   | 6.75E-05 |
| Cloxacillin               | 417   | 6.75E-05 |
| Fentanyl                  | 418   | 6.70E-05 |
| Fondaparinux              | 419   | 6.64E-05 |
| Aripiprazole              | 420   | 6.62E-05 |

|                  |     |          |
|------------------|-----|----------|
| Darbepoetin alfa | 421 | 6.62E-05 |
| Budesonide       | 422 | 6.61E-05 |
| Desogestrel      | 423 | 6.55E-05 |
| Spironolactone   | 424 | 6.44E-05 |
| Erythromycin     | 425 | 6.37E-05 |
| Methyldopa       | 426 | 6.35E-05 |
| Tizanidine       | 427 | 6.34E-05 |
| Lorazepam        | 428 | 6.32E-05 |
| Terbutaline      | 429 | 6.29E-05 |
| Dalteparin       | 430 | 6.25E-05 |
| Entacapone       | 431 | 6.20E-05 |
| Rivaroxaban      | 432 | 6.15E-05 |
| Meperidine       | 433 | 6.12E-05 |
| Clindamycin      | 434 | 6.10E-05 |
| Polyquad         | 435 | 6.07E-05 |
| Carvedilol       | 436 | 6.06E-05 |
| Rizatriptan      | 437 | 6.05E-05 |
| Hydromorphone    | 438 | 6.04E-05 |
| Lithium          | 439 | 5.99E-05 |
| Naratriptan      | 440 | 5.99E-05 |
| Piperacillin     | 441 | 5.85E-05 |
| Clavulanic acid  | 442 | 5.85E-05 |
| Doxazosin        | 443 | 5.83E-05 |
| Lisinopril       | 444 | 5.78E-05 |
| Pimozide         | 445 | 5.77E-05 |
| Empagliflozin    | 446 | 5.73E-05 |
| Ropinirole       | 447 | 5.61E-05 |
| Almotriptan      | 448 | 5.49E-05 |
| Procyclidine     | 449 | 5.49E-05 |
| Loratadine       | 450 | 5.48E-05 |
| Promethazine     | 451 | 5.45E-05 |
| Domperidone      | 452 | 5.44E-05 |
| Levobunolol      | 453 | 5.39E-05 |
| Tigecycline      | 454 | 5.35E-05 |
| Fosfomycin       | 455 | 5.35E-05 |
| Mupirocin        | 456 | 5.33E-05 |
| Salbutamol       | 457 | 5.30E-05 |
| Cefepime         | 458 | 5.30E-05 |
| Cyclobenzaprine  | 459 | 5.15E-05 |
| Hydroxyzine      | 460 | 5.05E-05 |
| Apixaban         | 461 | 5.01E-05 |
| Dorzolamide      | 462 | 4.92E-05 |
| Nortriptyline    | 463 | 4.91E-05 |
| Perampanel       | 464 | 4.89E-05 |
| Risperidone      | 465 | 4.88E-05 |

|                     |       |          |
|---------------------|-------|----------|
| Olanzapine          | 466   | 4.87E-05 |
| Primidone           | 467   | 4.77E-05 |
| Canagliflozin       | 468   | 4.73E-05 |
| Amoxicillin         | 469   | 4.71E-05 |
| Hydrochlorothiazide | 470   | 4.71E-05 |
| Clarithromycin      | 471   | 4.71E-05 |
| Oxazepam            | 472   | 4.70E-05 |
| Fluticasone         | 473   | 4.69E-05 |
| Dimenhydrinate      | 474   | 4.67E-05 |
| Adefovir            | 475.5 | 4.64E-05 |
| Lamivudine          | 475.5 | 4.64E-05 |
| Ritonavir           | 477   | 4.63E-05 |
| Amlodipine          | 478   | 4.60E-05 |
| Bisoprolol          | 479   | 4.58E-05 |
| Midodrine           | 480   | 4.52E-05 |
| Buprenorphine       | 481   | 4.52E-05 |
| Ipratropium         | 482   | 4.50E-05 |
| Benztropine         | 483   | 4.49E-05 |
| Methadone           | 484   | 4.47E-05 |
| Dabigatran          | 485   | 4.33E-05 |
| Saxagliptin         | 486   | 4.32E-05 |
| Enalapril           | 487   | 4.29E-05 |
| Frovatriptan        | 488   | 4.29E-05 |
| Eletriptan          | 489   | 4.22E-05 |
| Tadalafil           | 490   | 4.19E-05 |
| Varenicline         | 491   | 4.12E-05 |
| Bimatoprost         | 492   | 4.03E-05 |
| Tetrabenazine       | 493   | 4.02E-05 |
| Temazepam           | 494   | 3.97E-05 |
| Tamsulosin          | 495   | 3.92E-05 |
| Phenelzine          | 496   | 3.82E-05 |
| Flunisolide         | 497   | 3.79E-05 |
| Metolazone          | 498   | 3.78E-05 |
| Mometasone          | 499   | 3.75E-05 |
| Cetirizine          | 500   | 3.74E-05 |
| Tenofovir           | 501   | 3.72E-05 |
| Eplerenone          | 502   | 3.67E-05 |
| Entecavir           | 503   | 3.65E-05 |
| Quinapril           | 504   | 3.62E-05 |
| Olmesartan          | 505   | 3.62E-05 |
| Indapamide          | 506   | 3.61E-05 |
| Chlorpromazine      | 507   | 3.60E-05 |
| Ramipril            | 508   | 3.60E-05 |
| Perindopril         | 509   | 3.60E-05 |
| Cilazapril          | 510   | 3.57E-05 |

|                |     |          |
|----------------|-----|----------|
| Nelfinavir     | 511 | 3.57E-05 |
| Fosinopril     | 512 | 3.57E-05 |
| Eprosartan     | 513 | 3.57E-05 |
| Topiramate     | 514 | 3.56E-05 |
| Formoterol     | 515 | 3.51E-05 |
| Labetalol      | 516 | 3.48E-05 |
| Timolol        | 517 | 3.46E-05 |
| Olodaterol     | 518 | 3.45E-05 |
| Alfuzosin      | 519 | 3.45E-05 |
| Pindolol       | 520 | 3.45E-05 |
| Glycopyrronium | 521 | 3.44E-05 |
| Trazodone      | 522 | 3.43E-05 |
| Ethosuximide   | 523 | 3.37E-05 |
| Quetiapine     | 524 | 3.36E-05 |
| Escitalopram   | 525 | 3.28E-05 |
| Chlorthalidone | 526 | 3.21E-05 |
| Valproate      | 527 | 3.05E-05 |
| Buspirone      | 528 | 3.03E-05 |
| Cefoxitin      | 529 | 3.00E-05 |
| Fluphenazine   | 530 | 2.98E-05 |
| Tazobactam     | 531 | 2.97E-05 |
| Cefixime       | 532 | 2.92E-05 |
| Zopiclone      | 533 | 2.90E-05 |
| Terazosin      | 534 | 2.81E-05 |
| Silodosin      | 535 | 2.79E-05 |
| Mirabegron     | 536 | 2.72E-05 |
| Umeclidinium   | 537 | 2.72E-05 |
| Pizotiline     | 538 | 2.64E-05 |
| Delavirdine    | 539 | 2.53E-05 |
| Oxybutynin     | 540 | 2.50E-05 |
| Imipramine     | 541 | 2.49E-05 |
| Carbamazepine  | 542 | 2.44E-05 |
| Paroxetine     | 543 | 2.40E-05 |
| Mirtazapine    | 544 | 2.39E-05 |
| Flupentixol    | 545 | 2.39E-05 |
| Nabilone       | 546 | 2.37E-05 |
| Lamotrigine    | 547 | 2.36E-05 |
| Moclobemide    | 548 | 2.32E-05 |
| Alprazolam     | 549 | 2.30E-05 |
| Vigabatrin     | 550 | 2.29E-05 |
| Stavudine      | 551 | 2.24E-05 |
| Dutasteride    | 552 | 2.13E-05 |
| Pregabalin     | 553 | 2.07E-05 |
| Cefadroxil     | 554 | 1.98E-05 |
| Travoprost     | 555 | 1.97E-05 |

|                   |     |          |
|-------------------|-----|----------|
| Perphenazine      | 556 | 1.94E-05 |
| Trospium          | 557 | 1.90E-05 |
| Salmeterol        | 558 | 1.88E-05 |
| Tiotropium        | 559 | 1.86E-05 |
| Lacosamide        | 560 | 1.84E-05 |
| Sertraline        | 561 | 1.84E-05 |
| Efavirenz         | 562 | 1.82E-05 |
| Methsuximide      | 563 | 1.78E-05 |
| Vilanterol        | 564 | 1.77E-05 |
| Levetiracetam     | 565 | 1.76E-05 |
| Triazolam         | 566 | 1.75E-05 |
| Clorazepate       | 567 | 1.72E-05 |
| Nitrazepam        | 568 | 1.71E-05 |
| Bromazepam        | 569 | 1.70E-05 |
| Indacaterol       | 570 | 1.68E-05 |
| Prochlorperazine  | 571 | 1.66E-05 |
| Tolterodine       | 572 | 1.45E-05 |
| Naltrexone        | 573 | 1.43E-05 |
| Chlordiazepoxide  | 574 | 1.38E-05 |
| Ciclesonide       | 575 | 1.35E-05 |
| Clomipramine      | 576 | 1.33E-05 |
| Modafinil         | 577 | 1.31E-05 |
| Zolpidem          | 578 | 1.28E-05 |
| Flurazepam        | 579 | 1.27E-05 |
| Lurasidone        | 580 | 1.25E-05 |
| Oxcarbazepine     | 581 | 1.22E-05 |
| Clobazam          | 582 | 1.19E-05 |
| Abacavir          | 583 | 1.17E-05 |
| Olopatadine       | 584 | 1.11E-05 |
| Cefazolin         | 585 | 1.11E-05 |
| Pericyazine       | 586 | 9.02E-06 |
| Bupropion         | 587 | 8.73E-06 |
| Methotrimeprazine | 588 | 8.61E-06 |
| Fluvoxamine       | 589 | 8.40E-06 |
| Methylphenidate   | 590 | 7.96E-06 |
| Thiothixene       | 591 | 7.81E-06 |
| Lisdexamfetamine  | 592 | 7.59E-06 |
| Trimipramine      | 593 | 7.46E-06 |
| Eslicarbazepine   | 594 | 7.24E-06 |
| Doxepin           | 595 | 6.19E-06 |
| Cefaclor          | 596 | 5.52E-06 |
| Cefprozil         | 597 | 4.23E-06 |
| Divalproex        | 598 | 3.59E-06 |
| Solifenacin       | 599 | 3.56E-06 |
| Duloxetine        | 600 | 3.39E-06 |

|               |       |          |
|---------------|-------|----------|
| Venlafaxine   | 601   | 2.98E-06 |
| Atazanavir    | 602   | 2.90E-06 |
| Fesoterodine  | 603   | 2.77E-06 |
| Atomoxetine   | 604   | 2.69E-06 |
| Loxapine      | 605   | 2.59E-06 |
| Ziprasidone   | 606   | 2.43E-06 |
| Asenapine     | 607   | 2.41E-06 |
| Paliperidone  | 608   | 2.19E-06 |
| Lopinavir     | 609   | 1.97E-06 |
| Emtricitabine | 610   | 1.95E-06 |
| Nevirapine    | 611   | 1.67E-06 |
| Darunavir     | 612   | 1.62E-06 |
| Cobicistat    | 616.5 | 1.39E-06 |
| Dolutegravir  | 616.5 | 1.39E-06 |
| Elvitegravir  | 616.5 | 1.39E-06 |
| Etravirine    | 616.5 | 1.39E-06 |
| Fosamprenavir | 616.5 | 1.39E-06 |
| Maraviroc     | 616.5 | 1.39E-06 |
| Raltegravir   | 616.5 | 1.39E-06 |
| Rilpivirine   | 616.5 | 1.39E-06 |

---



**Supplementary Table 7.** Forty compounds ranked highly by an AI-driven *in silico* platform based on its predictions of their ability to reduce  $\alpha$ -synuclein oligomers were tested *in vitro*.

| Ranking | Drug Name     | Canonical Drug Function/Indication                                          | Potential Links to $\alpha$ -synuclein and PD                                                                |
|---------|---------------|-----------------------------------------------------------------------------|--------------------------------------------------------------------------------------------------------------|
| 1       | Verapamil     | Voltage-dependent calcium channel blocker, various cardiac diseases         | Calcium channel blockers within its family are associated with reduced PD risk <sup>1</sup>                  |
| 2       | Tretinoin     | Acne medication, acute promyelocytic leukemia                               | Unknown                                                                                                      |
| 3       | Caffeine      | Inhibitor of adenosine A2A receptor, commonly used stimulant                | Experimentally rescues rodent models of PD, <sup>2</sup> associated with reduced PD risk <sup>3</sup>        |
| 4       | Dexamethasone | Corticosteroid, anti-inflammatory                                           | Induces anti-inflammatory effect and reduces toxic $\alpha$ -synuclein aggregates <sup>4</sup>               |
| 5       | Rapamycin     | Immunosuppressant, post-transplantation                                     | Induces autophagy to reduce $\alpha$ -synuclein aggregates in numerous models of PD <sup>5</sup>             |
| 6       | Indomethacin  | NSAID, COX inhibitor                                                        | Exhibits neuroprotective effect in mouse models of PD, similar to other anti-inflammatory drugs <sup>6</sup> |
| 7       | Etoposide     | DNA topoisomerase inhibitor, anti-cancer                                    | Unknown                                                                                                      |
| 8       | Estradiol     | Female sex hormone, prescribed for hormone replacement therapy              | Exhibits neuroprotective effect on dopaminergic neurons exposed to MPP+ <i>in vitro</i> <sup>7</sup>         |
| 9       | Celecoxib     | NSAID, COX2 inhibitor, anti-arthritic                                       | Rescues dopaminergic dysfunction in a rodent LPS-induced neurotoxicity model <sup>8</sup>                    |
| 11      | Sulindac      | NSAID, COX inhibitor                                                        | Unknown                                                                                                      |
| 12      | Tamoxifen     | Estrogen receptor inhibitor, anti-breast cancer                             | Unknown                                                                                                      |
| 13      | Piroxicam     | NSAID, non-selective COX inhibitor                                          | Exhibited anti-fibrillogenic activity in a drug screen of various NSAIDs <sup>9</sup>                        |
| 14      | Minocycline   | Broad spectrum tetracycline-class antibiotic                                | Anti-inflammatory in MPTP mouse model <sup>10</sup>                                                          |
| 15      | Ketoconazole  | Topical antimycotic                                                         | Rescued neurodegeneration in <i>Drosophila</i> model of $\alpha$ -synuclein expression <sup>11</sup>         |
| 16      | Alitretinoin  | Eczema topical ointment                                                     | Unknown                                                                                                      |
| 17      | Lovastatin    | Inhibitor of de novo cholesterol synthesis, lowers blood cholesterol levels | Reduces $\alpha$ -synuclein abundance in mouse models <sup>12</sup>                                          |
| 18      | Erlotinib     | EGFR inhibitor, chemotherapy                                                | Unknown                                                                                                      |
| 19      | Ascorbic acid | Common micronutrient, provides antioxidant function                         | Exhibits neuroprotective effect in <i>Drosophila</i> neurodegeneration <sup>13</sup>                         |
| 20      | Flurbiprofen  | NSAID, possible COX inhibitor                                               | Exhibited anti-fibrillogenic activity in a drug screen of various NSAIDs <sup>14</sup>                       |

|    |                |                                                                  |                                                                                             |
|----|----------------|------------------------------------------------------------------|---------------------------------------------------------------------------------------------|
| 21 | Tetracycline   | Broad-spectrum antibiotic                                        | Unknown                                                                                     |
| 22 | Naproxen       | NSAID, nonselective COX inhibitor                                | Exhibited weak anti-fibrillogenic activity in a drug screen of various NSAIDs <sup>14</sup> |
| 23 | Propranolol    | Anti-hypertensive drug, beta-adrenergic receptor blocker         | Increases abundance of <i>SNCA</i> transcript <sup>15</sup>                                 |
| 24 | Temozolomide   | Alkylating agent, chemotherapy                                   | Unknown                                                                                     |
| 26 | Imatinib       | Bcr-Abl inhibitor, chemotherapy                                  | Derivatives of this compound rescue neurodegeneration in an MPTP mouse model <sup>16</sup>  |
| 27 | Allopurinol    | Uric acid synthesis inhibitor, gout                              | Unknown                                                                                     |
| 28 | Galantamine    | Acetylcholinesterase inhibitor, Alzheimer's disease              | Clinically used in PD dementia <sup>17</sup>                                                |
| 29 | Rifabutin      | Antibiotic, tuberculosis, and <i>Mycobacterium avium complex</i> | Unknown                                                                                     |
| 30 | Calcitriol     | Increases blood calcium levels                                   | Related compounds shown to reduce $\alpha$ -synuclein aggregation <sup>18</sup>             |
| 31 | Vincristine    | Microtubule destabilizing agent                                  | Unknown                                                                                     |
| 32 | Pioglitazone   | PPAR- $\gamma$ inducer, diabetes                                 | Neuroprotective in rodent models of PD <sup>19,20</sup>                                     |
| 33 | Mercaptopurine | Purine analog, chemotherapy                                      | Putative activator of neuroprotective factors <sup>21</sup>                                 |
| 34 | Melphalan      | DNA alkylating agent, chemotherapy                               | Unknown                                                                                     |
| 35 | Losartan       | Angiotensin receptor II antagonist, hypertension                 | Exhibits neuroprotective effect in cell and MPTP rodent model <sup>22,23</sup>              |
| 36 | Ibuprofen      | NSAID, COX inhibitor                                             | Clinical correlation with reduced PD risk <sup>24</sup>                                     |
| 37 | Theophylline   | Bronchodilator                                                   | Unknown                                                                                     |
| 38 | Acetaminophen  | Analgesic, anti-pyretic                                          | Rescues <i>C. elegans</i> models of dopaminergic neurodegeneration <sup>25</sup>            |
| 39 | Hydrocortisone | Steroid, anti-inflammatory                                       | Unknown                                                                                     |
| 42 | Auranofin      | Anti-inflammatory, arthritis                                     | Exhibits neuroprotective effect by reducing inflammation <sup>26</sup>                      |
| 43 | Pentoxifylline | Nonselective phosphodiesterase inhibitor                         | Rescues 6-OHDA rat model of PD <sup>27</sup>                                                |
| 46 | Iron sulfate   | Iron nutrient supplement                                         | Shows interaction with $\alpha$ -synuclein, possibly inducing sequestration <sup>28</sup>   |

---

These highly ranked compounds were excluded from *in vitro* testing for the following reasons: framycetin (ranking 10) and miconazole (ranking 44) are topical medications (not oral medications), sennosides (ranking 25) and polyethylene glycol (ranking 45) are laxatives, pseudoephedrine (ranking 40) is a controlled substance with limited access, and collagenase (ranking 41) is an enzyme (not a small molecule).

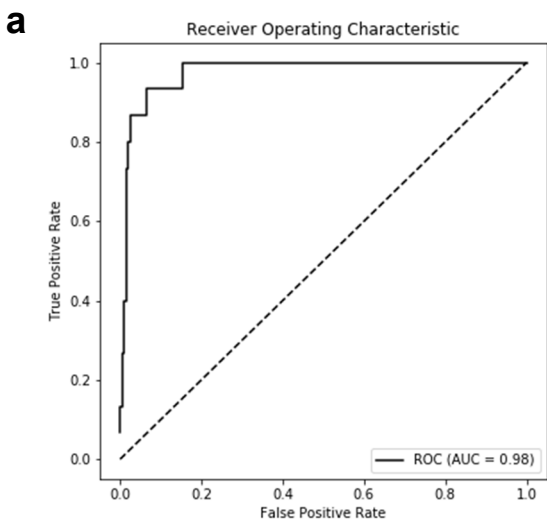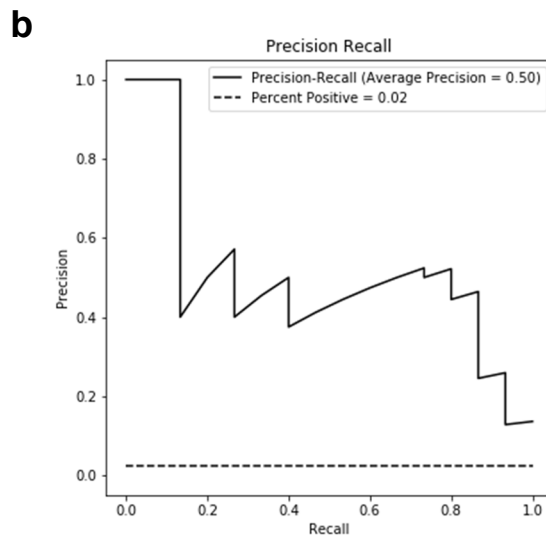

**Supplementary Figure 1. Performance of the algorithm used to rank candidate drugs by similarity to the known entities that reduce  $\alpha$ -synuclein oligomers.** (a) Receiver-operating characteristic (ROC) curve. The semantic framework was assessed using leave-one-out validation: one known entity was placed among the other candidate drugs and ranked, repeating for each individual drug in the known set. Individual points were connected using a stepwise curve. The area under curve (AUC) value is 0.98. A dashed line, with an AUC score of 0.5, represents a null hypothesis curve where the rankings of known entities made by IBM Watson for Drug Discovery Predictive Analytics would be completely random. (b) Precision-recall curve. The curve has an average precision of 0.50 and is always above the dashed line, a precision of 0.02 (the percent of positives), which represents a model with no skill.

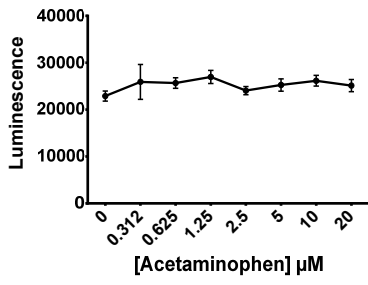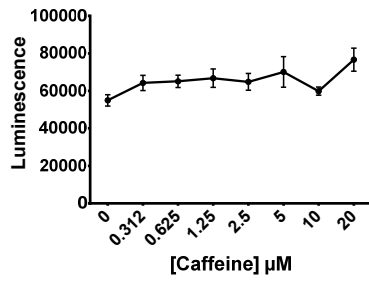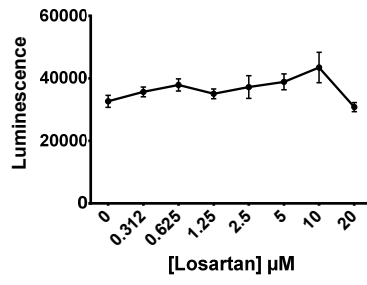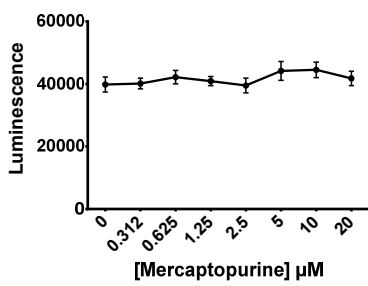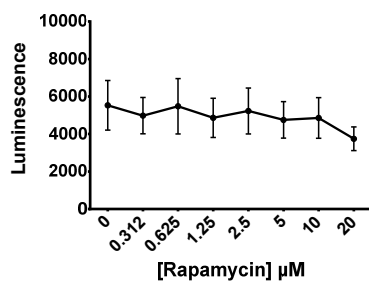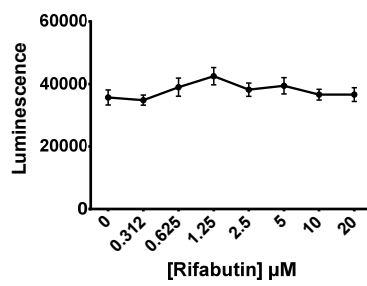

Supplementary Figure 2. Acetaminophen, caffeine, losartan, mercaptopurine, rapamycin, and rifabutin do not alter the activity of full-length *Gaussia* luciferase alone. Raw luminescence data (measured in relative luciferase units) corresponding with normalized data in Figure 5c are shown here (N=2 with n=8 replicates for each concentration).

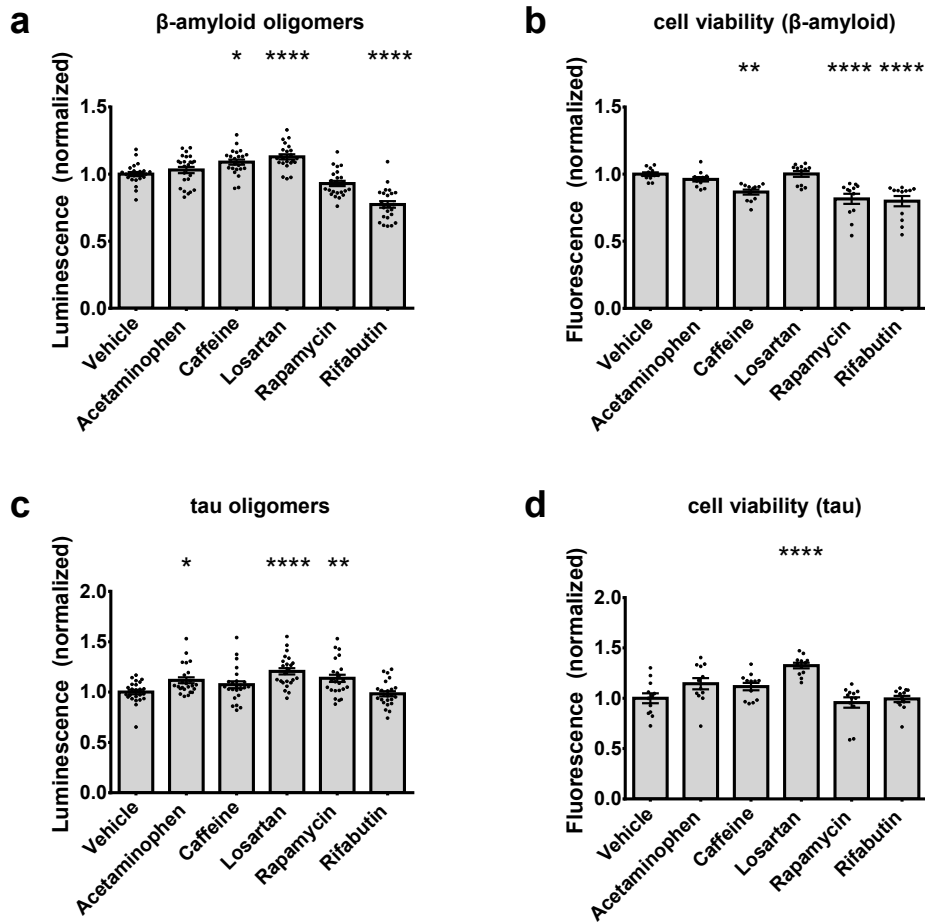

**Supplementary Figure 3. Effects of acetaminophen, caffeine, losartan, mercaptopurine, rapamycin, and rifabutin on  $\beta$ -amyloid and tau oligomers *in vitro*.** Testing of compounds found to reduce  $\alpha$ -synuclein oligomers for their effects on (a)  $\beta$ -amyloid oligomer levels *in vitro* using a *Gaussia* luciferase protein-fragment complementation cell assay (N=3 with n=8 replicates for each treatment) and (b) viability in these cells (N=3 with n=4 replicates for each treatment). Testing of compounds found to reduce  $\alpha$ -synuclein oligomers for their effects on (c) tau oligomer levels *in vitro* using a *Gaussia* luciferase protein-fragment complementation cell assay (N=3 with n=8 replicates for each treatment) and (d) viability in these cells (N=3 with n=4 replicates for each treatment) (two-tailed t-test, \*p<0.05, \*\*p<0.01, \*\*\*\*p<0.0001). Each data point represents an individual replicate.

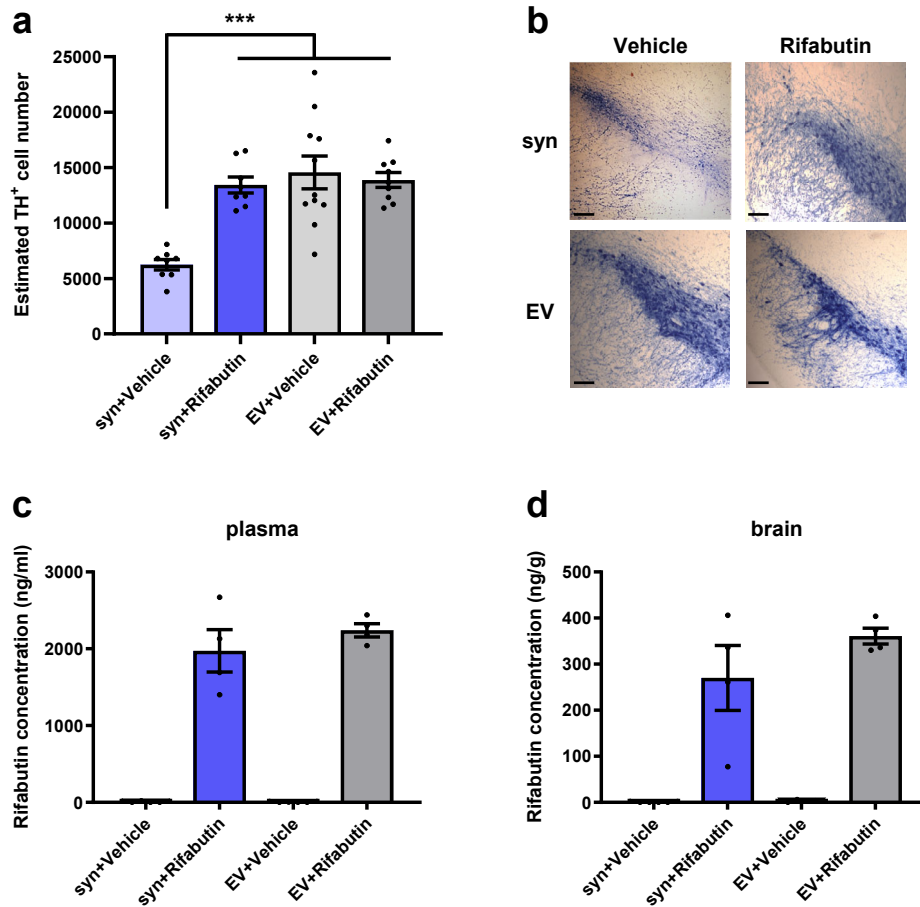

**Supplementary Figure 4. Rifabutin penetrates the blood-brain barrier and reduces nigral dopaminergic neuron loss in an AAV-based  $\alpha$ -synuclein rat model.** (a) Dopaminergic neuron loss in the SN was induced by stereotactic injection of human A53T  $\alpha$ -synuclein-expressing AAV (syn). AAV lacking the A53T  $\alpha$ -synuclein open reading frame was used as an empty vector control (EV). Animals injected with AAV-A53T  $\alpha$ -synuclein and treated with vehicle exhibited a substantial loss of dopaminergic (TH<sup>+</sup>) cells. Rifabutin rescued  $\alpha$ -synuclein-mediated dopaminergic neurodegeneration in the SN, restoring TH<sup>+</sup> cell numbers to those comparable to animals injected with AAV-EV and treated with vehicle or rifabutin (n=8-11 animals per treatment group, one-way ANOVA with Tukey's post-hoc test, \*\*\*p<0.001). (b) Representative images of TH staining of the SN injected with AAV-A53T  $\alpha$ -synuclein or AAV-EV from rats treated with vehicle or rifabutin. Scale bars are 200  $\mu$ m. Steady-state rifabutin concentrations in (c) plasma and (d) saline-perfused brain tissue from a subset of animals (n=4 per treatment group). Mean brain-to-plasma drug concentration ratio ( $\pm$  SD) for rifabutin treated animals was  $0.15 \pm 0.04$ .

## References

1. Pasternak, B. *et al.* Use of calcium channel blockers and Parkinson's disease. *Am. J. Epidemiol.* **175**, 627–635 (2012).
2. Ascherio, A. *et al.* Prospective study of caffeine consumption and risk of Parkinson's disease in men and women. *Ann. Neurol.* **50**, 56–63 (2001).
3. Chen, J. F. *et al.* Neuroprotection by caffeine and A(2A) adenosine receptor inactivation in a model of Parkinson's disease. *J. Neurosci.* **21**, RC143 (2001).
4. McLeary, F. A. *et al.* Dexamethasone inhibits copper-induced alpha-synuclein aggregation by a metallothionein-dependent mechanism. *Neurotox. Res.* **33**, 229–238 (2018).
5. Decressac, M. *et al.* TFEB-mediated autophagy rescues midbrain dopamine neurons from  $\alpha$ -synuclein toxicity. *Proc. Natl. Acad. Sci.* **110**, E1817–E1826 (2013).
6. La Vitola, P. *et al.* Alpha-synuclein oligomers impair memory through glial cell activation and via Toll-like receptor 2. *Brain. Behav. Immun.* **69**, 591–602 (2018).
7. Sawada, H. *et al.* Estradiol protects dopaminergic neurons in a MPP+ Parkinson's disease model. *Neuropharmacology* **42**, 1056–1064 (2002).
8. Kaizaki, A. *et al.* Celecoxib reduces brain dopaminergic neuronal dysfunction, and improves sensorimotor behavioral performance in neonatal rats exposed to systemic lipopolysaccharide. *J. Neuroinflammation* **10**, 45 (2013).
9. Khansari, P. S. & Coyne, L. NSAIDs in the treatment and/or prevention of neurological disorders. *Inflammopharmacology* **20**, 159–167 (2012).
10. Du, Y. *et al.* Minocycline prevents nigrostriatal dopaminergic neurodegeneration in the MPTP model of Parkinson's disease. *Proc. Natl. Acad. Sci.* **98**, 14669–14674 (2001).

11. Styczyńska-Soczka, K., Zechini, L. & Zografos, L. Validating the predicted effect of astemizole and ketoconazole using a *Drosophila* model of Parkinson's disease. *Assay Drug Dev. Technol.* **15**, 106–112 (2017).
12. Koob, A. O. *et al.* Lovastatin ameliorates alpha-synuclein accumulation and oxidation in transgenic mouse models of alpha-synucleinopathies. *Exp. Neurol.* **221**, 267–274 (2010).
13. Khan, S. *et al.* Effect of L-ascorbic Acid on the climbing ability and protein levels in the brain of *Drosophila* model of Parkinson's disease. *Int. J. Neurosci.* **122**, 704–709 (2012).
14. Hirohata, M., Ono, K., Morinaga, A. & Yamada, M. Non-steroidal anti-inflammatory drugs have potent anti-fibrillogenic and fibril-destabilizing effects for alpha-synuclein fibrils in vitro. *Neuropharmacology* **54**, 620–627 (2008).
15. Mittal, S. *et al.*  $\beta$ 2-Adrenoreceptor is a regulator of the  $\alpha$ -synuclein gene driving risk of Parkinson's disease. *Science* **357**, 891–898 (2017).
16. Hebron, M. L., Lonskaya, I. & Moussa, C. E.-H. Nilotinib reverses loss of dopamine neurons and improves motor behavior via autophagic degradation of  $\alpha$ -synuclein in Parkinson's disease models. *Hum. Mol. Genet.* **22**, 3315–3328 (2013).
17. Emre, M. Treatment of dementia associated with Parkinson's disease. *Parkinsonism Relat. Disord.* **13**, S457–S461 (2007).
18. Rcom-H'cheo-Gauthier, A. N., Meedeniya, A. C. B. & Pountney, D. L. Calcipotriol inhibits  $\alpha$ -synuclein aggregation in SH-SY5Y neuroblastoma cells by a Calbindin-D28k-dependent mechanism. *J. Neurochem.* **141**, 263–274 (2017).
19. Yu, H. C., Feng, S. F., Chao, P. L. & Lin, A. M. Y. Anti-inflammatory effects of pioglitazone on iron-induced oxidative injury in the nigrostriatal dopaminergic system. *Neuropathol. Appl. Neurobiol.* **36**, 612–622 (2010).



20. Ulusoy, G. K. *et al.* Effects of pioglitazone and retinoic acid in a rotenone model of Parkinson's disease. *Brain Res. Bull.* **85**, 380–384 (2011).
21. Kim, C.-H., Leblanc, P. & Kim, K.-S. 4-amino-7-chloroquinoline derivatives for treating Parkinson's disease: implications for drug discovery. *Expert Opin. Drug Discov.* **11**, 337–341 (2016).
22. Grammatopoulos, T. N., Outeiro, T. F., Hyman, B. T. & Standaert, D. G. Angiotensin II protects against  $\alpha$ -synuclein toxicity and reduces protein aggregation in vitro. *Biochem. Biophys. Res. Commun.* **363**, 846–851 (2007).
23. Grammatopoulos, T. N. *et al.* Angiotensin type 1 receptor antagonist losartan, reduces MPTP-induced degeneration of dopaminergic neurons in substantia nigra. *Mol. Neurodegener.* **2**, 1 (2007).
24. Gagne, J. J. & Power, M. C. Anti-inflammatory drugs and risk of Parkinson disease. *Neurology* **74**, 995–1002 (2010).
25. Locke, C. J., Fox, S. A., Caldwell, G. A. & Caldwell, K. A. Acetaminophen attenuates dopamine neuron degeneration in animal models of Parkinson's disease. *Neurosci. Lett.* **439**, 129–133 (2008).
26. Madeira, J. M. *et al.* Novel protective properties of auranofin: inhibition of human astrocyte cytotoxic secretions and direct neuroprotection. *Life Sci.* **92**, 1072–1080 (2013).
27. Neves, K. R. T. *et al.* Pentoxifylline neuroprotective effects are possibly related to its anti-inflammatory and TNF- $\alpha$  inhibitory properties, in the 6-OHDA model of Parkinson's disease. *Parkinsons Dis.* **2015**, 108179 (2015).
28. Davies, P., Moualla, D. & Brown, D. R. Alpha-synuclein is a cellular ferrireductase. *PLOS ONE* **6**, e15814 (2011).
